# Supplementary material
Source: ML conference proceedings conference paper supplement (https://openreview.net/forum?id=rLpLjCBW4J)
Supplement: supplementary_material [file attachment]

---

# Supplementary Materials for the paper “Preconditioning Matters: Fast Global Convergence of Non-convex Matrix Factorization via Scaled Gradient Descent”

---

We first rewrite the main update formulation of both ScaledGD and AltScaledGD

$$\begin{cases} \mathbf{U}_{k+1} = \mathbf{U}_k - \eta \nabla_{\mathbf{U}_k} f(\mathbf{U}_k, \mathbf{V}_k) (\mathbf{V}_k^\top \mathbf{V}_k)^{-1} \\ \mathbf{V}_{k+1} = \mathbf{V}_k - \eta \nabla_{\mathbf{V}_k} f(\mathbf{U}_k, \mathbf{V}_k) (\mathbf{U}_k^\top \mathbf{U}_k)^{-1} \end{cases} \quad (1)$$

$$\begin{cases} \mathbf{U}_{k+1} = \mathbf{U}_k - \eta \nabla_{\mathbf{U}_k} f(\mathbf{U}_k, \mathbf{V}_k) (\mathbf{V}_k^\top \mathbf{V}_k)^{-1} \\ \mathbf{V}_{k+1} = \mathbf{V}_k - \eta \nabla_{\mathbf{V}_k} f(\mathbf{U}_{k+1}, \mathbf{V}_k) (\mathbf{U}_{k+1}^\top \mathbf{U}_{k+1})^{-1} \end{cases} \quad (2)$$

where  $\mathbf{U}_k \in \mathbb{R}^{m \times d}$  and  $\mathbf{V}_k \in \mathbb{R}^{n \times d}$ .

## 1 Proofs of the lemmas and theorem in Section 4 (rank-1 case).

If  $d = 1$ , then  $\mathbf{U}_k, \mathbf{V}_k$  are all vectors.

**Lemma 1.** *If  $\langle \mathbf{M}, \mathbf{U}_k \mathbf{V}_k^\top \rangle \geq \|\mathbf{U}_k \mathbf{V}_k^\top\|_F^2 \neq 0$ , then there is constant  $C_u \geq 0$  such that*

$$\left| 1 - \frac{\|\mathbf{M}\|_F \cos \theta_k^u \cos \theta_k^v}{\|\mathbf{U}_k \mathbf{V}_k^\top\|_F} \right| \leq C_u (\|\mathbf{M}\|_F - \|\mathbf{U}_k \mathbf{V}_k^\top\|_F) \quad (3)$$

*Proof.* Since  $\langle \mathbf{M}, \mathbf{U}_k \mathbf{V}_k^\top \rangle \geq \|\mathbf{U}_k \mathbf{V}_k^\top\|_F^2$ , it follows directly that

$$\frac{\|\mathbf{M}\|_F \cos \theta_k^u \cos \theta_k^v}{\|\mathbf{U}_k \mathbf{V}_k^\top\|_F} \geq 1. \quad (4)$$

In consequence,

$$\begin{aligned} \left| 1 - \frac{\|\mathbf{M}\|_F \cos \theta_k^u \cos \theta_k^v}{\|\mathbf{U}_k \mathbf{V}_k^\top\|_F} \right| &= \frac{\|\mathbf{M}\|_F \cos \theta_k^u \cos \theta_k^v}{\|\mathbf{U}_k \mathbf{V}_k^\top\|_F} - 1 \\ &\leq \frac{\|\mathbf{M}\|_F - \|\mathbf{U}_k \mathbf{V}_k^\top\|_F}{\|\mathbf{U}_k \mathbf{V}_k^\top\|_F}. \end{aligned} \quad (5)$$

According to Lemma 4 and together with  $\frac{\|\mathbf{M}\|_F \cos \theta_k^u \cos \theta_k^v}{\|\mathbf{U}_k \mathbf{V}_k^\top\|_F} \geq 1$ , it is thus suffice to prove that  $\|\mathbf{U}_k \mathbf{V}_k^\top\|_F$  is monotonically increasing, meanwhile as  $\|\mathbf{U}_k \mathbf{V}_k^\top\|$  is bounded below, which guarantees that there exists constant  $C_u$  such that the result in Eq. (3) is true.  $\square$

**Lemma 2.** (Convergence of the distance between subspaces) *For the ScaledGD (1) with  $d = 1$ , if  $\|\mathbf{M}\|_F \cos \theta_k^u \cos \theta_k^v \geq \|\mathbf{U}_k \mathbf{V}_k^\top\|_F$ , then the following holds*

$$\|\mathcal{U}_{*\perp}^\top \mathcal{U}_{k+1}\|_2 \leq (1 - \eta) \|\mathcal{U}_{*\perp}^\top \mathcal{U}_k\|_2, \quad \|\mathcal{V}_{*\perp}^\top \mathcal{V}_{k+1}\|_2 \leq (1 - \eta) \|\mathcal{V}_{*\perp}^\top \mathcal{V}_k\|_2 \quad (6)$$

*Proof.* Since  $\mathbf{U}_{k+1} \in \mathbb{R}^{m \times 1}$ , we have

$$\|\mathcal{U}_{*\perp}^\top \mathbf{U}_{k+1}\|_2 = \frac{\|\mathcal{U}_{*\perp}^\top \mathbf{U}_{k+1}\|_2}{\|\mathbf{U}_{k+1}\|_2}. \quad (7)$$

Meanwhile,  $\mathbf{U}_{k+1} = (1 - \eta)\mathbf{U}_k + \eta \mathbf{M} \mathbf{V}_k (\mathbf{V}_k^\top \mathbf{V}_k)^{-1}$ , thus

$$\begin{aligned} \|\mathcal{U}_{*\perp}^\top \mathbf{U}_{k+1}\|_2 &= (1 - \eta) \frac{\|\mathcal{U}_{*\perp}^\top \mathbf{U}_k\|_F}{\|\mathbf{U}_{k+1}\|_F} \\ &= (1 - \eta) \frac{\|\mathcal{U}_{*\perp}^\top \mathbf{U}_k\|_2}{\|\mathbf{U}_k\|_2} \frac{\|\mathbf{U}_k\|_F}{\|\mathbf{U}_{k+1}\|_F} \\ &= (1 - \eta) \|\mathcal{U}_{*\perp}^\top \mathbf{U}_k\|_2 \frac{\|\mathbf{U}_k\|_F}{\|\mathbf{U}_{k+1}\|_F}. \end{aligned} \quad (8)$$

According to Lemma 4 and the condition that  $\|\mathbf{M}\|_F \cos \theta_k^u \cos \theta_k^v \geq \|\mathbf{U}_k \mathbf{V}_k^\top\|_F$ , then

$$\frac{\|\mathbf{U}_k\|_F}{\|\mathbf{U}_{k+1}\|_F} \leq 1 \text{ and } \frac{\|\mathbf{V}_k\|_F}{\|\mathbf{V}_{k+1}\|_F} \leq 1, \quad (9)$$

it is thus suffice to guarantee that

$$\|\mathcal{U}_{*\perp}^\top \mathbf{U}_{k+1}\|_2 \leq (1 - \eta) \|\mathcal{U}_{*\perp}^\top \mathbf{U}_k\|_2. \quad (10)$$

Similarly, we can guarantee

$$\|\mathcal{V}_{*\perp}^\top \mathbf{V}_{k+1}\|_2 \leq (1 - \eta) \|\mathcal{V}_{*\perp}^\top \mathbf{V}_k\|_2. \quad (11)$$

Thus, we finish the proof.  $\square$

**Theorem 5.** (Convergence of the matrix norm) *For the ScaledGD (1) with  $d = 1$ , if  $\|\mathbf{M}\|_F \cos \theta_k^u \cos \theta_k^v \geq \|\mathbf{U}_k \mathbf{V}_k^\top\|_F$  for all  $k \geq 0$ , then we have*

$$\|\mathbf{M}\|_F - \|\mathbf{U}_{k+1} \mathbf{V}_{k+1}^\top\|_F \leq (1 - \eta)^{2k} k C_\alpha \quad (12)$$

where  $C_\alpha$  is a constant and  $\eta$  is the step length  $0 \leq \eta < 1$ .

*Proof.* By ScaledGD Eq. (1), we have

$$\|\mathbf{U}_{k+1}\|_2^2 = (1 - \eta)^2 \|\mathbf{U}_k\|_2^2 + 2\eta(1 - \eta) \frac{\|\mathbf{M}\|_F \cos \theta_k^u \cos \theta_k^v \|\mathbf{U}_k\|_F}{\|\mathbf{V}_k\|_F} + \eta^2 \frac{\|\mathbf{M}\|_F^2 \cos^2 \theta_k^v}{\|\mathbf{V}_k\|_F^2} \quad (13)$$

and

$$\|\mathbf{V}_{k+1}\|_2^2 = (1 - \eta)^2 \|\mathbf{V}_k\|_2^2 + 2\eta(1 - \eta) \frac{\|\mathbf{M}\|_F \cos \theta_k^u \cos \theta_k^v \|\mathbf{V}_k\|_F}{\|\mathbf{U}_k\|_F} + \eta^2 \frac{\|\mathbf{M}\|_F^2 \cos^2 \theta_k^u}{\|\mathbf{U}_k\|_F^2} \quad (14)$$

which implies

$$\|\mathbf{U}_{k+1}\|_F \geq \left(1 - \eta + \eta \frac{\|\mathbf{M}\|_F \cos \theta_k^u \cos \theta_k^v}{\|\mathbf{U}_k \mathbf{V}_k^\top\|_F}\right) \|\mathbf{U}_k\|_F \quad (15)$$

and

$$\|\mathbf{V}_{k+1}\|_F \geq \left(1 - \eta + \eta \frac{\|\mathbf{M}\|_F \cos \theta_k^u \cos \theta_k^v}{\|\mathbf{U}_k \mathbf{V}_k^\top\|_F}\right) \|\mathbf{V}_k\|_F \quad (16)$$

In consequence, one obtains

$$\begin{aligned} \frac{\|\mathbf{U}_{k+1} \mathbf{V}_{k+1}^\top\|_F}{\|\mathbf{M}\|_F} &\geq (1 - \eta)^2 \frac{\|\mathbf{U}_k \mathbf{V}_k^\top\|_F}{\|\mathbf{M}\|_F} + \eta^2 \frac{\|\mathbf{M}\|_F \cos^2 \theta_k^u \cos^2 \theta_k^v}{\|\mathbf{U}_k \mathbf{V}_k^\top\|_F} + 2\eta(1 - \eta) \cos \theta_k^u \cos \theta_k^v \\ &\geq (1 - \eta)^2 \frac{\|\mathbf{U}_k \mathbf{V}_k^\top\|_F}{\|\mathbf{M}\|_F} + \eta^2 \cos \theta_u^k \cos \theta_v^k + 2\eta(1 - \eta) \cos \theta_u^k \cos \theta_v^k \\ &= (1 - \eta)^2 \frac{\|\mathbf{U}_k \mathbf{V}_k^\top\|_F}{\|\mathbf{M}\|_F} + (2\eta - \eta^2) \cos \theta_u^k \cos \theta_v^k \end{aligned} \quad (17)$$

then it follows

$$1 - \frac{\|\mathbf{U}_{k+1}\mathbf{V}_{k+1}^\top\|_F}{\|\mathbf{M}\|_F} \leq (1-\eta)^2 \left(1 - \frac{\|\mathbf{U}_k\mathbf{V}_k^\top\|_F}{\|\mathbf{M}\|_F}\right) + (2\eta - \eta^2)(1 - \cos\theta_u^k \cos\theta_v^k), \quad (18)$$

which implies

$$\|\mathbf{M}\|_F - \|\mathbf{U}_{k+1}\mathbf{V}_{k+1}^\top\|_F \leq (1-\eta)^2 (\|\mathbf{M}\|_F - \|\mathbf{U}_k\mathbf{V}_k^\top\|_F) + (2\eta - \eta^2)\|\mathbf{M}\|_F(1 - \cos\theta_u^k \cos\theta_v^k). \quad (19)$$

Meanwhile, according to Lemma 2, we have  $\sin\theta_u^{k+1} \leq (1-\eta)\sin\theta_u^k$  and  $\sin\theta_v^{k+1} \leq (1-\eta)\sin\theta_v^k$ , thus it is suffice to prove that

$$(1 - \cos\theta_u^{k+1} \cos\theta_v^{k+1}) \leq (1-\eta)^2(1 - \cos\theta_u^k \cos\theta_v^k) \leq (1-\eta)^{2k+1}(1 - \cos\theta_u^0 \cos\theta_v^0). \quad (20)$$

Together with Eq. (19), the following inequality holds

$$\begin{aligned} \|\mathbf{M}\|_F - \|\mathbf{U}_{k+1}\mathbf{V}_{k+1}^\top\|_F &\leq (2\eta - \eta^2)\|\mathbf{M}\|_F \sum_{i=1}^k (1-\eta)^{2i}(1 - \cos\theta_u^{k-i} \cos\theta_v^{k-i}) \\ &\quad + (1-\eta)^{2k} (\|\mathbf{M}\|_F - \|\mathbf{U}_0\mathbf{V}_0^\top\|_F) \\ &\leq (2\eta - \eta^2)\|\mathbf{M}\|_F \sum_{i=1}^k (1-\eta)^{2i}(1-\eta)^{2(k-i)}(1 - \cos\theta_u^0 \cos\theta_v^0) \\ &\quad + (1-\eta)^{2k} (\|\mathbf{M}\|_F - \|\mathbf{U}_0\mathbf{V}_0^\top\|_F) \\ &\leq (1-\eta)^{2k} k C_\alpha, \end{aligned} \quad (21)$$

where  $C_\alpha = \max\{(1 - \cos\theta_u^0 \cos\theta_v^0)(2\eta - \eta^2)\|\mathbf{M}\|_F, \frac{\|\mathbf{M}\|_F - \|\mathbf{U}_0\mathbf{V}_0^\top\|_F}{k}\}$ , which finishes our proof.  $\square$

**Lemma 3.** Let  $\eta \leq c_\eta < 1$  with  $c_\eta$  a small constant, if  $\|\mathbf{M}\|_F \cos\theta_0^u \cos\theta_0^v \geq \|\mathbf{U}_0\mathbf{V}_0^\top\|_F$  then the following is true

$$\|\mathbf{M}\|_F \cos\theta_k^u \cos\theta_k^v \geq \|\mathbf{U}_k\mathbf{V}_k^\top\|_F, \forall k > 0. \quad (22)$$

*Proof.* We prove this result by induction. Since  $\|\mathbf{M}\|_F \cos\theta_0^u \cos\theta_0^v \geq \|\mathbf{U}_0\mathbf{V}_0^\top\|_F$ , we assume that  $\|\mathbf{M}\|_F \cos\theta_{k-1}^u \cos\theta_{k-1}^v \geq \|\mathbf{U}_{k-1}\mathbf{V}_{k-1}^\top\|_F$ , then we need to prove  $\|\mathbf{M}\|_F \cos\theta_k^u \cos\theta_k^v \geq \|\mathbf{U}_k\mathbf{V}_k^\top\|_F$ . We first show that

$$\begin{aligned} \|\mathbf{U}_k\mathbf{V}_k^\top\|_F^2 &= (1-\eta)^2 \|\mathbf{U}_k\mathbf{V}_{k-1}^\top\|_F^2 + 2\eta(1-\eta) \frac{\|\mathbf{U}_k\|_F}{\|\mathbf{U}_{k-1}\|_F} \|\mathbf{U}_k\mathbf{V}_{k-1}^\top\|_F \|\mathbf{M}\|_F \cos\theta_{k-1}^u \cos\theta_{k-1}^v \\ &\quad + \eta^2 \frac{\|\mathbf{U}_k\|_F^2}{\|\mathbf{U}_{k-1}\|_F^2} \|\mathbf{M}\|_F^2 \cos^2\theta_{k-1}^u \\ &= \|\mathbf{U}_k\mathbf{V}_{k-1}^\top\|_F^2 \left( (1-\eta) + \eta \frac{\|\mathbf{M}\|_F}{\|\mathbf{U}_{k-1}\mathbf{V}_{k-1}^\top\|_F} \cos\theta_{k-1}^u \right)^2 \\ &= \|\mathbf{M}\|_F^2 \underbrace{\frac{\|\mathbf{U}_k\mathbf{V}_{k-1}^\top\|_F^2}{\|\mathbf{M}\|_F^2} \left( (1-\eta) + \eta \frac{\|\mathbf{M}\|_F}{\|\mathbf{U}_{k-1}\mathbf{V}_{k-1}^\top\|_F} \cos\theta_{k-1}^u \right)^2}_{\mathfrak{M}^2} \end{aligned} \quad (23)$$

To prove the result in Eq. (130), we need to guarantee that  $\mathfrak{M} \leq \cos\theta_k^u \cos\theta_k^v$ , which is equivalent to ensure that

$$(1-\eta) \frac{\|\mathbf{U}_k\mathbf{V}_{k-1}^\top\|_F}{\|\mathbf{M}\|_F} + \eta \frac{\|\mathbf{U}_k\mathbf{V}_{k-1}^\top\|_F}{\|\mathbf{U}_{k-1}\mathbf{V}_{k-1}^\top\|_F} \cos\theta_{k-1}^u \leq \cos\theta_k^u \cos\theta_k^v \quad (24)$$

Meanwhile, since  $\|\mathbf{M}\|_F \cos\theta_{k-1}^u \cos\theta_{k-1}^v \geq \|\mathbf{U}_{k-1}\mathbf{V}_{k-1}^\top\|_F$ , according to Lemma 2 it is easy to verify

$$\cos^2\theta_k^u \geq (1-\eta)^2 \cos^2\theta_{k-1}^u + 2\eta - \eta^2 \geq (1-\eta^2) \cos^2\theta_{k-1}^u + \eta^2, \quad (25)$$

together with

$$\begin{aligned}\|\mathbf{U}_k\|_F^2 &= (1-\eta)^2\|\mathbf{U}_{k-1}\|_F^2 + 2\eta(1-\eta)\frac{\|\mathbf{U}_{k-1}\|_F}{\|\mathbf{V}_{k-1}\|_F}\|\mathbf{M}\|_F\cos\boldsymbol{\theta}_{k-1}^u\cos\boldsymbol{\theta}_{k-1}^v + \eta^2\frac{\|\mathbf{M}\|_F^2\cos^2\boldsymbol{\theta}_{k-1}^v}{\|\mathbf{V}_{k-1}\|_F^2} \\ &\leq (1-\eta)^2\|\mathbf{U}_{k-1}\|_F^2 + (2\eta(1-\eta)\cos^2\boldsymbol{\theta}_{k-1}^u + \eta^2)\frac{\|\mathbf{M}\|_F^2\cos^2\boldsymbol{\theta}_{k-1}^v}{\|\mathbf{V}_{k-1}\|_F^2}\end{aligned}\quad (26)$$

and

$$\begin{aligned}\|\mathbf{U}_k\mathbf{V}_{k-1}^\top\|_F^2 &\leq (1-\eta)^2\|\mathbf{U}_{k-1}\mathbf{V}_{k-1}^\top\|_F^2 + (2\eta(1-\eta)\cos^2\boldsymbol{\theta}_{k-1}^u + \eta^2)\|\mathbf{M}\|_F^2\cos^2\boldsymbol{\theta}_{k-1}^v \\ &\leq (1-\eta)^2\|\mathbf{M}\|_F^2\cos^2\boldsymbol{\theta}_{k-1}^u\cos^2\boldsymbol{\theta}_{k-1}^v + (2\eta(1-\eta)\cos^2\boldsymbol{\theta}_{k-1}^u + \eta^2)\|\mathbf{M}\|_F^2\cos^2\boldsymbol{\theta}_{k-1}^v \\ &= ((1-\eta)^2\cos^2\boldsymbol{\theta}_{k-1}^u + (2\eta(1-\eta)\cos^2\boldsymbol{\theta}_{k-1}^u + \eta^2))\|\mathbf{M}\|_F^2\cos^2\boldsymbol{\theta}_{k-1}^v \\ &= ((1-\eta^2)\cos^2\boldsymbol{\theta}_{k-1}^u + \eta^2)\|\mathbf{M}\|_F^2\cos^2\boldsymbol{\theta}_{k-1}^v\end{aligned}\quad (27)$$

We obtain

$$\|\mathbf{M}\|_F\cos\boldsymbol{\theta}_k^u\cos\boldsymbol{\theta}_k^v \geq \|\mathbf{U}_k\mathbf{V}_{k-1}^\top\|_F. \quad (28)$$

By the condition  $\|\mathbf{M}\|_F\cos\boldsymbol{\theta}_{k-1}^u\cos\boldsymbol{\theta}_{k-1}^v \geq \|\mathbf{U}_{k-1}\mathbf{V}_{k-1}^\top\|_F$  and according to Lemma 2, we have

$$\cos\boldsymbol{\theta}_k^v \geq \cos\boldsymbol{\theta}_{k-1}^v, \quad (29)$$

and thus

$$\|\mathbf{M}\|_F\cos\boldsymbol{\theta}_k^u\cos\boldsymbol{\theta}_k^v \geq \|\mathbf{U}_k\mathbf{V}_{k-1}^\top\|_F, \quad (30)$$

with equality holds if and only if  $\cos\boldsymbol{\theta}_k^v = \cos\boldsymbol{\theta}_{k-1}^v$ . Denote by

$$\mathfrak{Z} = \frac{\frac{\|\mathbf{M}\|_F\cos\boldsymbol{\theta}_k^u\cos\boldsymbol{\theta}_k^v}{\|\mathbf{U}_k\mathbf{V}_{k-1}^\top\|_F} - 1}{\frac{\|\mathbf{M}\|_F\cos\boldsymbol{\theta}_{k-1}^u}{\|\mathbf{U}_{k-1}\mathbf{V}_{k-1}^\top\|_F} - 1}, \quad (31)$$

then it can be easily verified that  $\mathfrak{Z} > 0$ . As a result

$$\mathfrak{Z} \left( \frac{\|\mathbf{M}\|_F\cos\boldsymbol{\theta}_{k-1}^u}{\|\mathbf{U}_{k-1}\mathbf{V}_{k-1}^\top\|_F} - 1 \right) \|\mathbf{U}_k\mathbf{V}_{k-1}^\top\|_F = \|\mathbf{M}\|_F\cos\boldsymbol{\theta}_k^u\cos\boldsymbol{\theta}_k^v - \|\mathbf{U}_k\mathbf{V}_{k-1}^\top\|_F, \quad (32)$$

which is equivalent to

$$\mathfrak{Z} \left( \frac{\|\mathbf{M}\|_F\cos\boldsymbol{\theta}_{k-1}^u}{\|\mathbf{U}_{k-1}\mathbf{V}_{k-1}^\top\|_F} - 1 \right) \|\mathbf{U}_k\mathbf{V}_{k-1}^\top\|_F = \|\mathbf{M}\|_F\cos\boldsymbol{\theta}_k^u\cos\boldsymbol{\theta}_k^v - \|\mathbf{U}_k\mathbf{V}_{k-1}^\top\|_F, \quad (33)$$

and thus

$$\mathfrak{Z} \left( \frac{\|\mathbf{U}_k\|_F\|\mathbf{M}\|_F\cos\boldsymbol{\theta}_{k-1}^u}{\|\mathbf{U}_k\|_F} - \|\mathbf{U}_k\mathbf{V}_{k-1}^\top\|_F \right) \leq \|\mathbf{M}\|_F\cos\boldsymbol{\theta}_k^u\cos\boldsymbol{\theta}_k^v - \|\mathbf{U}_k\mathbf{V}_{k-1}^\top\|_F. \quad (34)$$

If  $\eta \leq c_\eta < \mathfrak{Z}$  with  $c_\eta$  sufficiently small, then we can guarantee that

$$\eta \left( \frac{\|\mathbf{U}_{k+1}\|_F\|\mathbf{M}\|_F\cos\boldsymbol{\theta}_k^u}{\|\mathbf{U}_k\|_F} - \|\mathbf{U}_{k+1}\mathbf{V}_k^\top\|_F \right) \leq \|\mathbf{M}\|_F\cos\boldsymbol{\theta}_{k+1}^u\cos\boldsymbol{\theta}_{k+1}^v - \|\mathbf{U}_{k+1}\mathbf{V}_k^\top\|_F \quad (35)$$

By simple reformulation, one obtains

$$(1-\eta)\frac{\|\mathbf{U}_k\mathbf{V}_{k-1}^\top\|_F}{\|\mathbf{M}\|_F} + \eta\frac{\|\mathbf{U}_k\mathbf{V}_{k-1}^\top\|_F}{\|\mathbf{U}_{k-1}\mathbf{V}_{k-1}^\top\|_F}\cos\boldsymbol{\theta}_{k-1}^u \leq \cos\boldsymbol{\theta}_k^u\cos\boldsymbol{\theta}_k^v \quad (36)$$

which is exactly the inequality we need in Eq. (132), thus we finish the proof.  $\square$

**Lemma 4.** *If the condition  $\|\mathbf{M}\|_F\max\{\cos\boldsymbol{\theta}_k^u, \cos\boldsymbol{\theta}_k^v\} < \|\mathbf{U}_k\mathbf{V}_k^\top\|_F$  is satisfied then we have*

$$\|\mathbf{U}_{k+1}\|_F < \|\mathbf{U}_k\|_F \quad \text{and} \quad \|\mathbf{V}_{k+1}\|_F < \|\mathbf{V}_k\|_F. \quad (37)$$

*Furthermore, if the condition  $\|\mathbf{M}\|_F\cos\boldsymbol{\theta}_k^u\cos\boldsymbol{\theta}_k^v \geq \|\mathbf{U}_k\mathbf{V}_k^\top\|_F$  is satisfied then we have*

$$\|\mathbf{U}_{k+1}\|_F \geq \|\mathbf{U}_k\|_F \quad \text{and} \quad \|\mathbf{V}_{k+1}\|_F \geq \|\mathbf{V}_k\|_F. \quad (38)$$

*Proof.* By Eq. (1), we have

$$\|U_{k+1}\|_F^2 = (1-\eta)^2\|U_k\|_F^2 + 2\eta(1-\eta)\frac{\|U_k\|_F}{\|V_k\|_F}\|M\|_F\cos\theta_u^k\cos\theta_v^k + \eta^2\frac{\|M\|_F^2\cos^2\theta_v^k}{\|V_k\|_F^2}. \quad (39)$$

If  $\|M\|_F \max\{\cos\theta_k^u, \cos\theta_k^v\} < \|U_k V_k^\top\|_F$ , then it is easy to verify that

$$\|U_{k+1}\|_F^2 \leq \|U_k\|_F^2. \quad (40)$$

Similarly, we have

$$\|V_{k+1}\|_F^2 \leq \|V_k\|_F^2, \quad (41)$$

if the condition  $\|M\|_F \max\{\cos\theta_k^u, \cos\theta_k^v\} < \|U_k V_k^\top\|_F$  is satisfied.

By contrast, if  $\|M\|_F \{\cos\theta_k^u \cos\theta_k^v\} \geq \|U_k V_k^\top\|_F$ , then we can obtain from Eq. (39) that

$$\|U_{k+1}\|_F^2 \geq \|U_k\|_F^2, \quad (42)$$

and similarly,

$$\|V_{k+1}\|_F^2 \geq \|V_k\|_F^2, \quad (43)$$

which finishes our proof.  $\square$

**Lemma 5.** After  $T_1$  iterations of ScaledGD Eq. (1) with  $d = 1$ , the following inequalities hold  $\forall k \geq T_1$

$$\|\mathcal{U}_{*\perp}^\top U_{k+1}\|_2 \leq (1 - \chi_k) \|\mathcal{U}_{*\perp}^\top U_k\|_2 \quad (44)$$

$$\|\mathcal{V}_{*\perp}^\top V_{k+1}\|_2 \leq (1 - \chi_k) \|\mathcal{V}_{*\perp}^\top V_k\|_2 \quad (45)$$

$$1 - \cos\theta_{k+1}^u \cos\theta_{k+1}^v \leq (1 - \chi_k)^2 (1 - \cos\theta_k^u \cos\theta_k^v) \quad (46)$$

where  $\chi_k = \frac{\eta\tau_k}{1-\eta(1-\tau_k)} < 1$  and  $\tau_k = \frac{\|M\|_F \cos\theta_k^u \cos\theta_k^v}{\|U_k V_k^\top\|_F} \in [1/2, 1]$ .

*Proof.* According to the analysis in Section 4.1.2 of the main paper, we know that after  $T_1$  iterations, we have

$$\|U_k V_k^\top - M\|_F \leq \|M\|_F, \quad \forall k \geq T_1, \quad (47)$$

which implies

$$\|U_k V_k^\top\|_F \leq 2\|M\|_F \cos\theta_k^u \cos\theta_k^v \quad (48)$$

Since the results for  $\|U_k V_k^\top\|_F \leq \|M\|_F \cos\theta_k^u \cos\theta_k^v$  is easy to analyze according to Lemma 2, therefore we mainly focus on

$$\|M\|_F \cos\theta_k^u \cos\theta_k^v \leq \|U_k V_k^\top\|_F \leq 2\|M\|_F \cos\theta_k^u \cos\theta_k^v. \quad (49)$$

By Eq. (1), we have

$$\|U_{k+1}\|_F^2 = (1-\eta)^2\|U_k\|_F^2 + 2\eta(1-\eta)\frac{\|U_k\|_F}{\|V_k\|_F}\|M\|_F\cos\theta_u^k\cos\theta_v^k + \eta^2\frac{\|M\|_F^2\cos^2\theta_v^k}{\|V_k\|_F^2}. \quad (50)$$

and consequently

$$\frac{\|U_k\|_F^2}{\|U_{k+1}\|_F^2} = \frac{1}{(1-\eta)^2 + 2\eta(1-\eta)\frac{\|M\|_F \cos\theta_k^u \cos\theta_k^v}{\|U_k V_k^\top\|_F} + \eta^2\frac{\|M\|_F^2 \cos^2\theta_k^v}{\|U_k V_k^\top\|_F^2}} \quad (51)$$

thus

$$\frac{\|U_k\|}{\|U_{k+1}\|} \leq \frac{1}{\sqrt{(1-\eta)^2 + 2\eta(1-\eta)\tau_k + \eta^2\tau_k^2}} = \frac{1}{1-\eta+\eta\tau_k}. \quad (52)$$

It is easy to verify  $\tau_k = \frac{\|M\|_F \cos\theta_k^u \cos\theta_k^v}{\|U_k V_k^\top\|_F} \in [1/2, 1]$ ,  $\forall k \geq T_1$  (according to Eq. (49)), then

$$\begin{aligned} \|\mathcal{U}_{*\perp}^\top U_{k+1}\|_2 &= (1-\eta)\|\mathcal{U}_{*\perp}^\top U_k\|_2 \frac{\|U_k\|_2}{\|U_{k+1}\|_2} \\ &\leq \frac{1-\eta}{1-\eta+\eta\tau_k} \|\mathcal{U}_{*\perp}^\top U_k\|_2, \\ &= (1-\chi_k)\|\mathcal{U}_{*\perp}^\top U_k\|_2 \end{aligned} \quad (53)$$

and  $\chi_k = \frac{\eta\tau_k}{1-\eta(1-\tau_k)} < 1$ . Similarly, we can guarantee that

$$\begin{aligned}\|\mathcal{V}_{*\perp}^\top \mathcal{V}_{k+1}\|_2 &= (1-\eta)\|\mathcal{V}_{*\perp}^\top \mathcal{V}_k\|_2 \frac{\|\mathbf{V}_k\|_2}{\|\mathbf{V}_{k+1}\|_2} \\ &\leq \frac{1-\eta}{1-\eta+\eta\tau_k} \|\mathcal{V}_{*\perp}^\top \mathcal{V}_k\|_2 \\ &= (1-\chi_k)\|\mathcal{V}_{*\perp}^\top \mathcal{V}_k\|_2\end{aligned}\quad (54)$$

The above inequalities Eq. (53) and Eq. (54) further imply that

$$\cos^2 \boldsymbol{\theta}_{k+1}^u \geq (1-\chi_k)^2 \cos^2 \boldsymbol{\theta}_k^u + 2\chi_k - \chi_k^2, \quad (55)$$

$$\cos^2 \boldsymbol{\theta}_{k+1}^v \geq (1-\chi_k)^2 \cos^2 \boldsymbol{\theta}_k^v + 2\chi_k - \chi_k^2, \quad (56)$$

thus

$$\begin{aligned}\cos^2 \boldsymbol{\theta}_{k+1}^u \cos^2 \boldsymbol{\theta}_{k+1}^v &\geq (1-\chi_k)^4 \cos^2 \boldsymbol{\theta}_k^u \cos^2 \boldsymbol{\theta}_k^v + (2\chi_k - \chi_k^2)(1-\chi_k)^2 (\cos^2 \boldsymbol{\theta}_k^u + \cos^2 \boldsymbol{\theta}_k^v) \\ &\quad + (2\chi_k - \chi_k^2)^2, \\ &\geq ((1-\chi_k)^2 \cos^2 \boldsymbol{\theta}_k^u \cos^2 \boldsymbol{\theta}_k^v + 2\chi_k - \chi_k^2)^2\end{aligned}\quad (57)$$

which is suffice to guarantee that

$$1 - \cos^2 \boldsymbol{\theta}_{k+1}^u \cos^2 \boldsymbol{\theta}_{k+1}^v \leq (1-\chi_k)^2 (1 - \cos^2 \boldsymbol{\theta}_k^u \cos^2 \boldsymbol{\theta}_k^v). \quad (58)$$

Therefore we have finish our proof.  $\square$

**Lemma 6.** (Convergence of the distance between subspaces) *For AltScaledGD (2), if  $\|\mathbf{M}\|_F \cos^2 \boldsymbol{\theta}_k^u \cos^2 \boldsymbol{\theta}_k^v \geq \|\mathbf{U}_k \mathbf{V}_k^\top\|_F$  and  $0 < \eta \leq 1$ , then the following holds*

$$\|\mathcal{U}_{*\perp}^\top \mathcal{U}_{k+1}\|_2 \leq (1-\eta)\|\mathcal{U}_{*\perp}^\top \mathcal{U}_k\|_2, \quad \|\mathcal{V}_{*\perp}^\top \mathcal{V}_{k+1}\|_2 \leq (1-\eta)\|\mathcal{V}_{*\perp}^\top \mathcal{V}_k\|_2. \quad (59)$$

*Proof.* The proof of Lemma 6 is similar to that of Lemma 2. It is straightforward that

$$\|\mathcal{U}_{*\perp}^\top \mathcal{U}_{k+1}\|_2 = (1-\eta)\|\mathcal{U}_{*\perp}^\top \mathcal{U}_k\|_2 \frac{\|\mathbf{U}_k\|_2}{\|\mathbf{U}_{k+1}\|_2}. \quad (60)$$

and

$$\|\mathcal{V}_{*\perp}^\top \mathcal{V}_{k+1}\|_2 = (1-\eta)\|\mathcal{V}_{*\perp}^\top \mathcal{V}_k\|_2 \frac{\|\mathbf{V}_k\|_2}{\|\mathbf{V}_{k+1}\|_2}. \quad (61)$$

By Eq. (1) and Eq. (2), we have

$$\|\mathbf{U}_{k+1}\|_F^2 = (1-\eta)^2 \|\mathbf{U}_k\|_F^2 + 2\eta(1-\eta) \frac{\|\mathbf{U}_k\|_F}{\|\mathbf{V}_k\|_F} \|\mathbf{M}\|_F \cos^2 \boldsymbol{\theta}_u^k \cos^2 \boldsymbol{\theta}_v^k + \eta^2 \frac{\|\mathbf{M}\|_F^2 \cos^2 \boldsymbol{\theta}_v^k}{\|\mathbf{V}_k\|_F^2}. \quad (62)$$

and

$$\|\mathbf{V}_{k+1}\|_F^2 = (1-\eta)^2 \|\mathbf{V}_k\|_F^2 + 2\eta(1-\eta) \frac{\|\mathbf{V}_k\|_F}{\|\mathbf{U}_{k+1}\|_F} \|\mathbf{M}\|_F \cos^2 \boldsymbol{\theta}_u^{k+1} \cos^2 \boldsymbol{\theta}_v^k + \eta^2 \frac{\|\mathbf{M}\|_F^2 \cos^2 \boldsymbol{\theta}_u^{k+1}}{\|\mathbf{U}_{k+1}\|_F^2}. \quad (63)$$

respectively. If  $\|\mathbf{M}\|_F \cos^2 \boldsymbol{\theta}_k^u \cos^2 \boldsymbol{\theta}_k^v \geq \|\mathbf{U}_k \mathbf{V}_k^\top\|_F$ , then

$$\begin{aligned}\|\mathbf{U}_{k+1}\|_F^2 &= (1-\eta)^2 \|\mathbf{U}_k\|_F^2 + 2\eta(1-\eta) \frac{\|\mathbf{U}_k\|_F}{\|\mathbf{V}_k\|_F} \|\mathbf{M}\|_F \cos^2 \boldsymbol{\theta}_u^k \cos^2 \boldsymbol{\theta}_v^k + \eta^2 \frac{\|\mathbf{M}\|_F^2 \cos^2 \boldsymbol{\theta}_v^k}{\|\mathbf{V}_k\|_F^2} \\ &\geq (1-\eta)^2 \|\mathbf{U}_k\|_F^2 + 2\eta(1-\eta) \|\mathbf{U}_k\|_F^2 + \eta^2 \|\mathbf{U}_k\|_F^2 \\ &\geq \|\mathbf{U}_k\|_F^2\end{aligned}\quad (64)$$

thus

$$\|\mathcal{U}_{*\perp}^\top \mathcal{U}_{k+1}\|_2 \leq (1-\eta)\|\mathcal{U}_{*\perp}^\top \mathcal{U}_k\|_2 \quad (65)$$

which implies

$$\cos^2 \boldsymbol{\theta}_{k+1}^u \geq (1-\eta^2) \cos^2 \boldsymbol{\theta}_k^u + \eta^2, \quad (66)$$

Meanwhile, we have

$$\begin{aligned}
\|U_{k+1} V_k^\top\|_F^2 &= (1-\eta)^2 \|U_k V_k^\top\|_F^2 + 2\eta(1-\eta) \|U_k V_k^\top\|_F \|M\|_F \cos \theta_k^u \cos \theta_k^v + \eta^2 \|M\|_F^2 \cos^2 \theta_k^v \\
&\leq (1-\eta)^2 \|M\|_F^2 \cos^2 \theta_k^u \cos^2 \theta_k^v + 2\eta(1-\eta) \|M\|_F^2 \cos^2 \theta_k^u \cos^2 \theta_k^v + \eta^2 \|M\|_F^2 \cos^2 \theta_k^v \\
&\leq (1-\eta^2) \|M\|_F^2 \cos^2 \theta_k^u \cos^2 \theta_k^v + \eta^2 \cos^2 \theta_k^v \\
&\leq \|M\|_F^2 \cos^2 \theta_{k+1}^u \cos^2 \theta_k^v
\end{aligned} \tag{67}$$

Together with Eq. (63), the following result holds

$$\|V_{k+1}\|_F^2 \geq \|V_k\|_F^2. \tag{68}$$

According to Eq. (61), and Eq. (65), we have the results in Eq. (59), which finishes our proof.  $\square$

**Lemma 7.** For *AltScaledGD* (2), if  $\|M\|_F \cos \theta_0^u \cos \theta_0^v \geq \|U_0 V_0^\top\|_F$  and  $0 < \eta \leq 1$ , then the following is true

$$\|M\|_F \cos \theta_k^u \cos \theta_k^v \geq \|U_k V_k^\top\|_F, \forall k > 0. \tag{69}$$

*Proof.* We prove the results by induction. Since  $\|M\|_F \cos \theta_0^u \cos \theta_0^v \geq \|U_0 V_0^\top\|_F$ , we assume that  $\|M\|_F \cos \theta_k^u \cos \theta_k^v \geq \|U_k V_k^\top\|_F$  holds, we need to prove  $\sigma_r(M) \cos \theta_{k+1}^u \cos \theta_{k+1}^v \geq \sigma_r(U_{k+1} V_{k+1}^\top)$ . According to Lemma 2, we have

$$\cos^2 \theta_{k+1}^u \geq (1-\eta)^2 \cos^2 \theta_{k+1}^u + 2\eta - \eta^2 \tag{70}$$

Similarly, we have  $\cos^2 \theta_{k+1}^v \geq (1-\eta)^2 \cos^2 \theta_k^v + 2\eta - \eta^2$ . Then

$$\cos^2 \theta_{k+1}^u \cos^2 \theta_{k+1}^v \geq (1-\eta)^2 \cos^2 \theta_{k+1}^u \cos^2 \theta_k^v + (2\eta - \eta^2) \cos^2 \theta_{k+1}^u \tag{71}$$

Meanwhile, according to Equation (2), we have

$$\begin{aligned}
\|U_{k+1}\|^2 &= \|U_k\|^2 + 2\eta(1-\eta) \frac{\|U_k\|}{\|V_k\|} \|M\|_F \cos \theta_k^u \cos \theta_k^v + \eta^2 \frac{\|M\|_F^2 \cos^2 \theta_k^v}{\|V_k\|^2} + (\eta^2 - 2\eta) \|U_k\|^2 \\
&\leq (1-\eta)^2 \|U_k\|^2 + (2\eta(1-\eta) \cos^2 \theta_k^u + \eta^2) \frac{\|M\|_F^2 \cos^2 \theta_k^v}{\|V_k\|^2}
\end{aligned} \tag{72}$$

Similarly, we have

$$\|V_{k+1}\|^2 = \|V_k\|^2 + 2\eta(1-\eta) \frac{\|V_k\|}{\|U_{k+1}\|} \|M\|_F \cos \theta_{k+1}^u \cos \theta_k^v + \eta^2 \frac{\|M\|_F^2 \cos^2 \theta_{k+1}^u}{\|U_{k+1}\|^2} + (\eta^2 - 2\eta) \|V_k\|^2, \tag{73}$$

thus

$$\begin{aligned}
&\|U_{k+1} V_{k+1}^\top\|_F^2 \\
&\leq (1-\eta)^2 \|U_{k+1} V_k^\top\|_F^2 + 2\eta(1-\eta) \|U_{k+1} V_k^\top\|_F \|M\|_F \cos \theta_{k+1}^u \cos \theta_k^v + \eta^2 \|M\|_F^2 \cos^2 \theta_{k+1}^u.
\end{aligned} \tag{74}$$

According to Equation (72), we have

$$\begin{aligned}
\|U_{k+1} V_k^\top\|_F^2 &\leq (1-\eta)^2 \|U_k V_k^\top\|_F^2 + (2\eta(1-\eta) \cos^2 \theta_k^u + \eta^2) \|M\|_F^2 \cos^2 \theta_k^v \\
&\leq (1-\eta)^2 \|M\|_F^2 \cos^2 \theta_k^u \cos^2 \theta_k^v + (2\eta(1-\eta) \cos^2 \theta_k^u + \eta^2) \|M\|_F^2 \cos^2 \theta_k^v \\
&= ((1-\eta^2) \cos^2 \theta_k^u + \eta^2) \|M\|_F^2 \cos^2 \theta_k^v
\end{aligned} \tag{75}$$

According to Equation (70), if  $0 \leq \eta \leq 1$ , we have

$$\cos^2 \theta_{k+1}^u \geq (1-\eta^2) \cos^2 \theta_k^u + \eta^2. \tag{76}$$

Thus

$$\|U_{k+1} V_k^\top\|_F^2 \leq \|M\|_F^2 \cos^2 \theta_k^v \cos^2 \theta_{k+1}^u, \tag{77}$$

in consequence we have the following result

$$\begin{aligned}
& \|U_{k+1} V_{k+1}^\top\|_F^2 \\
& \leq (1-\eta)^2 \|M\|_F^2 \cos^2 \theta_{k+1}^u \cos^2 \theta_k^v + 2\eta(1-\eta) \|M\|_F^2 \cos^2 \theta_{k+1}^u \cos^2 \theta_k^v + \eta^2 \|M\|_F^2 \cos^2 \theta_{k+1}^u \\
& \leq (1-\eta)^2 \|M\|_F^2 \cos^2 \theta_{k+1}^u \cos^2 \theta_k^v + 2\eta(1-\eta) \|M\|_F^2 \cos^2 \theta_{k+1}^u + \eta^2 \|M\|_F^2 \cos^2 \theta_{k+1}^u \\
& \leq \cos^2 \theta_{k+1}^u \cos^2 \theta_{k+1}^v \|M\|_F^2
\end{aligned} \tag{78}$$

where the last inequality is due to Equation (71), then we finish the proof.  $\square$

## 2 Proofs of the theorems in Section 3 (rank- $d$ case).

### 2.1 Proofs for the results of ScaledGD.

**Theorem 1** (General random initialization). *Let  $U_0 \in \mathbb{R}^{m \times d}$  and  $V_0 \in \mathbb{R}^{n \times d}$  be random Gaussian that follow  $\mathcal{N}(0, \sigma)$  for  $\sigma > c_{\text{init}}$  ( $c_{\text{init}}$  is a positive constant), and  $U_k, V_k$  are updated by Eq. (1). If  $\eta \leq c_\eta < 1$  for small constant  $c_\eta$ , we have that the objective function of the LRMF problem decreases linearly after  $T_1 = O(\ln \frac{d}{\delta})$  iterations, namely*

$$\|U_{k+T_1} V_{k+T_1}^\top - M\|_F \leq \alpha_1 (1 - \chi_{k+T_1})^k \|M\|_F \tag{79}$$

where  $\chi_{k+T_1}$  is monotonically increasing from  $\frac{\eta^2}{(2-\eta)^2}$  to  $\eta$ ,  $\delta$  is a sufficiently small constant,  $\alpha_1$  is a constant.

*Proof.* Let  $c_{\text{init}}$  be constant such that  $\sigma \geq c_{\text{init}}$  indicates  $\|U_0 V_0^\top\|_F^2 \geq \langle U_0 V_0^\top, M \rangle$ . The proof follows the proof sketch presented in Section 4 of the main paper, specifically, we can upper-bound the objective by four terms as

$$\begin{aligned}
\|U_{k+1} V_{k+1}^\top - M\|_F & \leq \underbrace{(1-\eta)^2 \|U_k V_k^\top - M\|_F}_{\textcircled{1}} + \underbrace{(1-\eta)\eta \frac{\|M V_{k\perp}\|_F}{\|M\|_F} \cdot \|M\|_F}_{\textcircled{2}} \\
& \quad + \underbrace{\eta(1-\eta) \frac{\|U_{k\perp}^\top M\|_F}{\|M\|_F} \cdot \|M\|_F}_{\textcircled{3}} + \underbrace{\eta^2 \|M V_k (V_k^\top V_k)^{-1} (U_k^\top U_k)^{-1} U_k^\top M - M\|_F}_{\textcircled{4}}
\end{aligned} \tag{80}$$

According to Lemma 14, we know that

$$\|M V (V^\top V)^{-1} (U^\top U)^{-1} U^\top M - M\|_F < C \|M\|_F \left| 1 - \frac{\|M V_k\|_F \|U_k^\top M\|_F}{\|M\|_F \|U_k V_k^\top\|_F} \right| \tag{81}$$

It is easy to verify that  $\left| 1 - \frac{\|M V_k\|_F \|U_k^\top M\|_F}{\|M\|_F \|U_k V_k^\top\|_F} \right|$  is bounded as  $\|U_k V_k^\top\|_F$  is strictly greater than zero, thus with sufficiently small  $\eta$  one can guarantee that all the three terms  $\textcircled{2}$ ,  $\textcircled{3}$  and  $\textcircled{4}$  are smaller than  $\|M\|_F$ . Furthermore, it is easy to prove for small  $\eta$  that

$$\|U_k V_k^\top - M\|_F < (1-\eta)^{2k} \|U_0 V_0^\top - M\|_F + \|M\|_F, \tag{82}$$

and in consequence if  $k \geq T_1 = O(\ln \frac{d}{\delta})$  for sufficiently small  $\delta$ , the following holds

$$\|U_{k+T_1} V_{k+T_1}^\top - M\|_F \leq \|M\|_F, \forall k \geq 0, \tag{83}$$

which implies

$$\frac{1}{2} \|U_{k+T_1} V_{k+T_1}^\top\|_F^2 \leq \langle U_{k+T_1} V_{k+T_1}^\top, M \rangle, \forall k \geq 0. \tag{84}$$

Since

$$\begin{aligned}
\|U_{k+1} V_{k+1}^\top\|_F & \leq (1-\eta)^2 \|U_k V_k^\top\|_F + \eta(1-\eta) \|U_k^\top M\|_F + \eta(1-\eta) \|M V_k\|_F \\
& \quad + \eta^2 \|M V_k (V_k^\top V_k)^{-1} (U_k^\top U_k)^{-1} U_k^\top M\|_F, \forall k \geq 0.
\end{aligned} \tag{85}$$



Similar to Eq. (83), we can guarantee that  $\|U_k V_k^\top\|_F \leq \|M\|_F$  after  $T_1$  iterations, yet still satisfy  $\frac{\|M V_k\|_F \|U_k^\top M\|_F}{\|M\|_F \|U_k V_k^\top\|_F} \leq 1, \forall k \geq T_1$ .

Let us define

$$\cos \theta_k^v = \frac{\|M V_k\|_F}{\|M\|_F}, \cos \theta_k^u = \frac{\|U_k^\top M\|_F}{\|M\|_F}, \quad (86)$$

then we have  $\left|1 - \frac{\|M V_k\|_F \|U_k^\top M\|_F}{\|M\|_F \|U_k V_k^\top\|_F}\right| \leq (1 - \cos \theta_k^u \cos \theta_k^v), \forall k \geq T_1$ . Therefore

$$\begin{aligned} \|U_{k+T_1+1} V_{k+T_1+1}^\top - M\|_F &\leq \underbrace{(1-\eta)^2 \|U_{k+T_1} V_{k+T_1}^\top - M\|_F}_{\textcircled{1}} + \underbrace{(1-\eta)\eta \frac{\|M V_{k+T_1}\|_F}{\|M\|_F} \|M\|_F}_{\textcircled{2}} \\ &\quad + \underbrace{\eta(1-\eta) \frac{\|U_{k+T_1}^\top M\|_F}{\|M\|_F} \|M\|_F}_{\textcircled{3}} + \underbrace{\eta^2 C \|M\|_F (1 - \cos \theta_{k+T_1}^u \cos \theta_{k+T_1}^v)}_{\textcircled{4}} \end{aligned} \quad (87)$$

According to Lemma 10, Lemma 15 and Lemma 11, we know that the three terms  $\textcircled{2}$ ,  $\textcircled{3}$  and  $\textcircled{4}$  are upper-bounded by linearly decreasing functions, therefore we have the upper-bound of the objective as

$$\begin{aligned} \|U_{k+T_1+1} V_{k+T_1+1}^\top - M\|_F &\leq (1-\eta)^2 \|U_{k+T_1} V_{k+T_1}^\top - M\|_F + (1-\eta)\eta(1-\chi_{k+T_1})^k \|M\|_F \|\mathcal{V}_{* \perp}^\top \mathcal{V}_0\|_2 \\ &\quad + \eta(1-\eta)(1-\chi_{k+T_1})^k \|M\|_F \|\mathcal{U}_{* \perp}^\top \mathcal{U}_0\|_2 + \eta^2(1-\chi_{k+T_1})^{2k} C \|M\|_F (1-C_u C_v) \\ &\leq (1-\eta)^2 \|U_{k+T_1} V_{k+T_1}^\top - M\|_F + (2-\eta)\eta(1-\chi_{k+T_1})^k \|M\|_F \alpha \\ &= (2-\eta)\eta \sum_{i=1}^k (1-\eta)^{2i} (1-\chi_{k+T_1})^{k-i} \|M\|_F \alpha + (1-\eta)^{2(k+T_1)} \|U_0 V_0^\top - M\|_F \\ &\leq (1-\chi_{k+T_1})^k \|M\|_F \alpha + (1-\eta)^{2(k+T_1)} \|U_0 V_0^\top - M\|_F \\ &\leq (1-\chi_{k+T_1})^k \|M\|_F \alpha_1 \end{aligned} \quad (88)$$

$\forall k \geq 0$  and  $\alpha_1 = \max\{\alpha, \|U_0 V_0^\top - M\|_F / \|M\|_F, \beta\}$   $\alpha = \max\{\|\mathcal{V}_{* \perp}^\top \mathcal{V}_0\|_2, \|\mathcal{U}_{* \perp}^\top \mathcal{U}_0\|_2, C(1-C_u C_v)\}$ . Meanwhile, according to Lemma 10, one can deduce that  $\chi_{k+T_1}$  is lower-bounded by  $\frac{\eta^2}{(2-\eta)^2}$  which indicates the linear convergence of the objective function. With the decrease of the objective function, we know that  $\tau_{k+T_1}$  is increasing from  $1/2$  to  $1$  and correspondingly  $\chi_{k+T_1}$  increasing from  $\frac{\eta^2}{(2-\eta)^2}$  to  $\eta$ .

Furthermore, if  $\|U_k V_k^\top\|_F^2 \leq \langle U_k V_k^\top, M \rangle$  and  $\frac{\|M V_k\|_F \|U_k^\top M\|_F}{\|M\|_F \|U_k V_k^\top\|_F} \geq 1, \forall k \geq T_1$ , then according to Lemma 8 and Theorem 6 we know that

$$\begin{aligned} \|U_{k+T_1+1} V_{k+T_1+1}^\top - M\|_F &\leq (1-\eta)^2 \|U_{k+T_1} V_{k+T_1}^\top - M\|_F + (1-\eta)\eta(1-\eta)^k \|M\|_F \|\mathcal{V}_{* \perp}^\top \mathcal{V}_0\|_2 \\ &\quad + \eta(1-\eta)(1-\eta)^k \|M\|_F \|\mathcal{U}_{* \perp}^\top \mathcal{U}_0\|_2 + \eta^2(1-\eta)^k C_\alpha \\ &\leq (1-\eta)^2 \|U_{k+T_1} V_{k+T_1}^\top - M\|_F + (2-\eta)\eta(1-\eta)^k \|M\|_F \beta \\ &= (2-\eta)\eta \sum_{i=1}^k (1-\eta)^{2i} (1-\eta)^{k-i} \|M\|_F \beta + (1-\eta)^{2(k+T_1)} \|U_0 V_0^\top - M\|_F \\ &\leq (1-\eta)^k \|M\|_F \beta + (1-\eta)^{2(k+T_1)} \|U_0 V_0^\top - M\|_F \\ &\leq (1-\eta)^k \|M\|_F \alpha_1 \end{aligned} \quad (89)$$

where  $\alpha_1 = \max\{\|U_0 V_0^\top - M\|_F / \|M\|_F, \beta\}$  and  $\beta = \max\{\|\mathcal{V}_{* \perp}^\top \mathcal{V}_0\|_2, \|\mathcal{U}_{* \perp}^\top \mathcal{U}_0\|_2, C_\alpha(2\eta-\eta^2)\}$ . Both Eq. (88) and Eq. (91) guarantee the linear convergence of the objective function. Since  $\chi_{k+T_1} \leq \eta$ , thus the result in Eq. (79) is proved.  $\square$

**Theorem 2** (Small initialization). *Let  $U_0 \in \mathbb{R}^{m \times d}$  and  $V_0 \in \mathbb{R}^{n \times d}$  be random Gaussian that follow  $\mathcal{N}(0, \sigma)$ , with  $\sigma \leq c_{\text{init}}$  and  $U_k, V_k$  are updated by Eq. (1). If  $\eta \leq c_\eta < 1$  for small constant  $c_\eta$ , we*

have that the objective function of the LRMF problem decreases linearly, namely

$$\|\mathbf{U}_k \mathbf{V}_k^\top - \mathbf{M}\|_F \leq \alpha_2 (1 - \eta)^k \|\mathbf{M}\|_F \quad (90)$$

where  $c_{\text{init}}$  is a small constant and  $\alpha_2$  is a constant.

*Proof.* Let  $c_{\text{init}}$  be a small constant such that if  $\sigma \leq c_{\text{init}}$ , then we have  $\|\mathbf{U}_0 \mathbf{V}_0^\top\|_F^2 \geq \langle \mathbf{U}_0 \mathbf{V}_0^\top, \mathbf{M} \rangle$ <sup>1</sup>. Therefore, according to Lemma 8, Lemma 9 and Theorem 6, we know that the objective function is upper-bounded by

$$\begin{aligned} \|\mathbf{U}_{k+1} \mathbf{V}_{k+1}^\top - \mathbf{M}\|_F &\leq (1 - \eta)^2 \|\mathbf{U}_k \mathbf{V}_k^\top - \mathbf{M}\|_F + (1 - \eta)\eta(1 - \eta)^k \|\mathbf{M}\|_F \|\mathcal{V}_{*\perp}^\top \mathcal{V}_0\|_2 \\ &\quad + \eta(1 - \eta)(1 - \eta)^k \|\mathbf{M}\|_F \|\mathcal{U}_{*\perp}^\top \mathcal{U}_0\|_2 + \eta^2(1 - \eta)^k C_\alpha \\ &\leq (1 - \eta)^2 \|\mathbf{U}_k \mathbf{V}_k^\top - \mathbf{M}\|_F + (2 - \eta)\eta(1 - \eta)^k \|\mathbf{M}\|_F \beta \\ &= (2 - \eta)\eta \sum_{i=1}^k (1 - \eta)^{2i} (1 - \eta)^{k-i} \|\mathbf{M}\|_F \beta + (1 - \eta)^{2k} \|\mathbf{U}_0 \mathbf{V}_0^\top - \mathbf{M}\|_F \\ &\leq (1 - \eta)^k \|\mathbf{M}\|_F \beta + (1 - \eta)^{2k} \|\mathbf{U}_0 \mathbf{V}_0^\top - \mathbf{M}\|_F \\ &\leq (1 - \eta)^k \|\mathbf{M}\|_F \alpha_2 \end{aligned} \quad (91)$$

where  $\alpha_2 = \max\{\|\mathbf{U}_0 \mathbf{V}_0^\top - \mathbf{M}\|_F / \|\mathbf{M}\|_F, \beta\}$  and  $\beta = \max\{\|\mathcal{V}_{*\perp}^\top \mathcal{V}_0\|_2, \|\mathcal{U}_{*\perp}^\top \mathcal{U}_0\|_2, (1 - \cos\theta_u^0 \cos\theta_v^0)(2\eta - \eta^2)\}$ . Thus we finish the proof.  $\square$

## 2.2 Proofs for the results of AltScaledGD.

**Theorem 3** (General random initialization). *Let  $\mathbf{U}_0 \in \mathbb{R}^{m \times d}$  and  $\mathbf{V}_0 \in \mathbb{R}^{n \times d}$  be random Gaussian that follow  $\mathcal{N}(0, \sigma)$  for any  $\sigma > c_{\text{init}}$ ,  $\mathbf{U}_k, \mathbf{V}_k$  are updated by Eq. (2), we have that the objective function of LRMF problem decreases linearly after  $T_1 = O(\ln \frac{d}{\delta})$  iterations, namely*

$$\|\mathbf{U}_{k+T_1} \mathbf{V}_{k+T_1}^\top - \mathbf{M}\|_F \leq \alpha_1 (1 - \chi_{k+T_1})^k \|\mathbf{M}\|_F, \forall k \geq 0 \quad (92)$$

where  $\chi_{k+T_1}$  is monotonically increasing from  $\frac{\eta^2}{(2-\eta)^2}$  to  $\eta$ ,  $0 < \eta \leq 1$  and  $\alpha_1$  is a constant.

*Proof.* The proof follows the proof sketch given in Section 4.2 of the main paper, while different to Section 4.2, the Theorem 3 focuses on the case  $\text{rank}(\mathbf{M}) = d$ . We decompose the proof into three phases: initial phase, saddle avoid phase and linear convergence phase. Specifically, the objective function is upper-bounded by three terms as

$$\|\mathbf{U}_{k+1} \mathbf{V}_{k+1}^\top - \mathbf{M}\|_F \leq \underbrace{(1 - \eta)^2 \|\mathbf{U}_k \mathbf{V}_k^\top - \mathbf{M}\|_F}_{\textcircled{1}} + \underbrace{(\eta - \eta^2) \|\mathcal{V}_{k\perp}^\top \mathbf{M}\|_F}_{\textcircled{2}} + \underbrace{\eta \|\mathcal{U}_{k+1\perp}^\top \mathbf{M}\|_F}_{\textcircled{3}}, \quad (93)$$

**1) Initial phase.** It can be easily verified that

$$\|\mathbf{U}_k \mathbf{V}_k^\top - \mathbf{M}\|_F < (1 - \eta)^{2k} \|\mathbf{U}_0 \mathbf{V}_0^\top - \mathbf{M}\|_F + \|\mathbf{M}\|_F, \quad (94)$$

and in consequence if  $k \geq T_1 = O(\ln \frac{d}{\delta})$  for sufficiently small  $\delta$ , the following holds

$$\|\mathbf{U}_{k+T_1} \mathbf{V}_{k+T_1}^\top - \mathbf{M}\|_F \leq \|\mathbf{M}\|_F, \forall k \geq 0. \quad (95)$$

The initial phase lasts at most  $T_1$  iterations.

**2) Saddle avoid phase.** The Eq. (95) implies that

$$\frac{1}{2} \|\mathbf{U}_{k+T_1} \mathbf{V}_{k+T_1}^\top\|_F^2 \leq \langle \mathbf{M}, \mathbf{U}_{k+T_1} \mathbf{V}_{k+T_1}^\top \rangle, \quad (96)$$

and furthermore

$$\frac{\|\mathcal{U}_{k+T_1}^\top \mathbf{M} \mathcal{V}_{k+T_1}\|_F}{\|\mathbf{U}_{k+T_1} \mathbf{V}_{k+T_1}^\top\|_F} \geq \frac{\langle \mathbf{U}_{k+T_1} \mathbf{V}_{k+T_1}^\top, \mathbf{M} \rangle}{\|\mathbf{U}_{k+T_1} \mathbf{V}_{k+T_1}^\top\|_F^2} = \tau_{k+T_1} \geq \frac{1}{2}. \quad (97)$$

---

<sup>1</sup>If  $\langle \mathbf{U}_0 \mathbf{V}_0^\top, \mathbf{M} \rangle \leq 0$  we can simply reset  $\mathbf{U}_0 = -\mathbf{U}_0$  or  $\mathbf{V}_0 = -\mathbf{V}_0$

If furthermore  $\frac{\langle \mathbf{U}_{k+T_1} \mathbf{V}_{k+T_1}^\top, \mathbf{M} \rangle}{\|\mathbf{U}_{k+T_1} \mathbf{V}_{k+T_1}^\top\|_F^2} \leq 1$ , and according to Eq. (2), we have  $\forall k \geq 0$

$$\begin{aligned} \|\mathbf{U}_{k+1} \mathbf{V}_k^\top\|_F^2 &= (1-\eta)^2 \|\mathbf{U}_k \mathbf{V}_k^\top\|_F^2 + (2\eta - 2\eta^2) \langle \mathbf{U}_k \mathbf{V}_k^\top, \mathbf{M} \rangle + \eta^2 \langle \mathbf{M} \mathbf{V}_k \mathbf{V}_k^\top, \mathbf{M} \mathbf{V}_k \mathbf{V}_k^\top \rangle \\ &\geq (1-\eta)^2 \|\mathbf{U}_k \mathbf{V}_k^\top\|_F^2 + (2\eta - 2\eta^2) \langle \mathbf{U}_k \mathbf{V}_k^\top, \mathbf{M} \rangle + \eta^2 \|\mathbf{U}_k^\top \mathbf{M} \mathbf{V}_k\|_F^2 \end{aligned} \quad (98)$$

together with Eq. (97), the following holds

$$\frac{\|\mathbf{U}_{k+T_1} \mathbf{V}_{k+T_1}^\top\|_F^2}{\|\mathbf{U}_{k+T_1+1} \mathbf{V}_{k+T_1}^\top\|_F^2} \leq \frac{1}{(1-\eta)^2 + \tau_{k+T_1}(1-\eta) + \eta^2 \tau_{k+T_1}^2}. \quad (99)$$

Similarly, one obtains

$$\frac{\|\mathbf{U}_{k+T_1+1} \mathbf{V}_{k+T_1}^\top\|_F^2}{\|\mathbf{U}_{k+T_1+1} \mathbf{V}_{k+T_1+1}^\top\|_F^2} \leq \frac{1}{(1-\eta)^2 + \tau_{k+T_1}(1-\eta) + \eta^2 \tau_{k+T_1}^2}, \quad (100)$$

thus we can guarantee

$$\frac{\|\mathbf{U}_{k+T_1} \mathbf{V}_{k+T_1}^\top\|_F}{\|\mathbf{U}_{k+T_1+1} \mathbf{V}_{k+T_1+1}^\top\|_F} \leq \frac{1}{(1-\eta + \eta \tau_{k+T_1})^2} \quad (101)$$

Meanwhile, according to Lemma 15, we can upper-bound the terms ② and ③ by

$$\|\mathcal{U}_{k+T_1 \perp}^\top \mathbf{M}\|_F \leq \frac{\|\mathcal{U}_{* \perp}^\top \mathbf{U}_{k+T_1}\|_F}{\|\mathbf{U}_{k+T_1} \mathbf{V}_{k+T_1}^\top\|_F} \|\mathbf{M}\|_F \mathfrak{L}_u. \quad (102)$$

and

$$\|\mathcal{V}_{k+T_1 \perp}^\top \mathbf{M}^\top\|_F \leq \frac{\|\mathcal{V}_{* \perp}^\top \mathbf{V}_{k+T_1}\|_F}{\|\mathbf{U}_{k+T_1} \mathbf{V}_{k+T_1}^\top\|_F} \|\mathbf{M}\|_F \mathfrak{L}_v \quad (103)$$

respectively. Then we show that the upper-bound Eq. (102) and Eq. (173) decreases linearly. Specifically,

$$\begin{aligned} \frac{\|\mathcal{U}_{* \perp}^\top \mathbf{U}_{k+T_1}\|_F}{\|\mathbf{U}_{k+T_1} \mathbf{V}_{k+T_1}^\top\|_F} &= (1-\eta) \frac{\|\mathcal{U}_{* \perp}^\top \mathbf{U}_{k+T_1-1}\|_F}{\|\mathbf{U}_{k+T_1-1} \mathbf{V}_{k+T_1-1}^\top\|_F} \frac{\|\mathbf{U}_{k+T_1-1} \mathbf{V}_{k+T_1-1}^\top\|_F}{\|\mathbf{U}_{k+T_1} \mathbf{V}_{k+T_1}^\top\|_F} \\ &\leq \frac{1-\eta}{(1-\eta + \eta \tau_{k+T_1})^2} \frac{\|\mathcal{U}_{* \perp}^\top \mathbf{U}_{k+T_1-1}\|_F}{\|\mathbf{U}_{k+T_1-1} \mathbf{V}_{k+T_1-1}^\top\|_F}, \\ &= (1-\chi_{k+T_1}) \frac{\|\mathcal{U}_{* \perp}^\top \mathbf{U}_{k+T_1-1}\|_F}{\|\mathbf{U}_{k+T_1-1} \mathbf{V}_{k+T_1-1}^\top\|_F} \end{aligned} \quad (104)$$

similarly, we have

$$\begin{aligned} \frac{\|\mathcal{V}_{* \perp}^\top \mathbf{V}_{k+T_1}\|_F}{\|\mathbf{U}_{k+T_1} \mathbf{V}_{k+T_1}^\top\|_F} &= (1-\eta) \frac{\|\mathcal{V}_{* \perp}^\top \mathbf{V}_{k+T_1-1}\|_F}{\|\mathbf{U}_{k+T_1-1} \mathbf{V}_{k+T_1-1}^\top\|_F} \frac{\|\mathbf{U}_{k+T_1-1} \mathbf{V}_{k+T_1-1}^\top\|_F}{\|\mathbf{U}_{k+T_1} \mathbf{V}_{k+T_1}^\top\|_F} \\ &\leq \frac{1-\eta}{(1-\eta + \eta \tau_{k+T_1})^2} \frac{\|\mathcal{V}_{* \perp}^\top \mathbf{V}_{k+T_1-1}\|_F}{\|\mathbf{U}_{k+T_1-1} \mathbf{V}_{k+T_1-1}^\top\|_F}, \\ &= (1-\chi_{k+T_1}) \frac{\|\mathcal{V}_{* \perp}^\top \mathbf{V}_{k+T_1-1}\|_F}{\|\mathbf{U}_{k+T_1-1} \mathbf{V}_{k+T_1-1}^\top\|_F} \end{aligned} \quad (105)$$

where  $\tau_{k+T_1} \in [1/2, 1]$  and correspondingly  $1 > \chi_{k+T_1} = \frac{\eta^2(1-\tau_{k+T_1})^2 + 2\eta\tau_{k+T_1} - \eta}{(1-\eta + \eta\tau_{k+T_1})^2} > 0$ .

When

$$1 \geq \frac{\langle \mathbf{U}_{k+T_1} \mathbf{V}_{k+T_1}^\top, \mathbf{M} \rangle}{\|\mathbf{U}_{k+T_1} \mathbf{V}_{k+T_1}^\top\|_F^2} = \tau_{k+T_1} \geq \frac{1}{2}. \quad (106)$$

according to Eq. (98) it is easy to verify that  $\|\mathbf{U}_{k+T_1+1} \mathbf{V}_{k+T_1+1}^\top\|_F^2 \leq \|\mathbf{U}_{k+T_1} \mathbf{V}_{k+T_1}^\top\|_F^2$ . Meanwhile, the objective function is monotonically decreasing according to Eq. (104) and Eq. (105). Together with Eq. (95), we have

$$\|\mathbf{U}_{k+T_1} \mathbf{V}_{k+T_1}^\top - \mathbf{M}\|_F^2 \leq \|\mathbf{M}\|_F^2 - \zeta_{k+T_1}, \quad (107)$$

and  $\zeta_{k+T_1}$  is monotonically increasing. In consequence, we have

$$\langle \mathbf{U}_{k+T_1} \mathbf{V}_{k+T_1}^\top, \mathbf{M} \rangle \geq \frac{1}{2} \|\mathbf{U}_{k+T_1} \mathbf{V}_{k+T_1}^\top\|_F^2 + \frac{1}{2} \zeta_{k+T_1}, \quad (108)$$

as  $\|\mathbf{U}_{k+T_1} \mathbf{V}_{k+T_1}^\top\|_F^2$  is monotonically decreasing and  $\zeta_{k+T_1}$  is monotonically increasing, we can obtain that  $\tau_{k+T_1}$  is monotonically increasing from  $1/2$  to  $1$  until  $\langle \mathbf{U}_{k+T_1} \mathbf{V}_{k+T_1}^\top, \mathbf{M} \rangle \geq \|\mathbf{U}_{k+T_1} \mathbf{V}_{k+T_1}^\top\|_F^2$ . Therefore  $\chi_{k+T_1}$  is monotonically increasing from  $\left(\frac{\eta/2}{1-\eta/2}\right)^2$  to  $\eta$ .

**3) Linear convergence phase.** If  $\langle \mathbf{U}_{k+T_1} \mathbf{V}_{k+T_1}^\top, \mathbf{M} \rangle \geq \|\mathbf{U}_{k+T_1} \mathbf{V}_{k+T_1}^\top\|_F^2$  for  $k \geq 0$ , then according to Lemma 12, we have

$$\langle \mathbf{U}_{t+T_1} \mathbf{V}_{t+T_1}^\top, \mathbf{M} \rangle \geq \|\mathbf{U}_{t+T_1} \mathbf{V}_{t+T_1}^\top\|_F^2, \forall t > k, \quad (109)$$

together with Eq. (98), we can easily prove that  $\|\mathbf{U}_{k+T_1+1} \mathbf{V}_{k+T_1+1}^\top\|_F^2 \geq \|\mathbf{U}_{k+T_1} \mathbf{V}_{k+T_1}^\top\|_F^2$  and similarly  $\|\mathbf{U}_{k+T_1+1} \mathbf{V}_{k+T_1+1}^\top\|_F^2 \geq \|\mathbf{U}_{k+T_1+1} \mathbf{V}_{k+T_1}^\top\|_F^2$ , which yields

$$\|\mathbf{U}_{k+T_1+1} \mathbf{V}_{k+T_1+1}^\top\|_F \geq \|\mathbf{U}_{k+T_1} \mathbf{V}_{k+T_1}^\top\|_F. \quad (110)$$

According to Eq. (104), Eq. (105) and Eq. (116) we know

$$\frac{\|\mathcal{U}_{* \perp}^\top \mathbf{U}_{k+T_1}\|_F}{\|\mathbf{U}_{k+T_1} \mathbf{V}_{k+T_1}^\top\|_F} \leq (1-\eta) \frac{\|\mathcal{U}_{* \perp}^\top \mathbf{U}_{k+T_1-1}\|_F}{\|\mathbf{U}_{k+T_1-1} \mathbf{V}_{k+T_1-1}^\top\|_F}, \quad (111)$$

and

$$\frac{\|\mathcal{V}_{* \perp}^\top \mathbf{V}_{k+T_1}\|_F}{\|\mathbf{U}_{k+T_1} \mathbf{V}_{k+T_1}^\top\|_F} \leq (1-\eta) \frac{\|\mathcal{V}_{* \perp}^\top \mathbf{V}_{k+T_1-1}\|_F}{\|\mathbf{U}_{k+T_1-1} \mathbf{V}_{k+T_1-1}^\top\|_F}. \quad (112)$$

Holding all these results, we are guarantee to prove that

$$\begin{aligned} \|\mathbf{U}_{k+T_1+1} \mathbf{V}_{k+T_1+1}^\top - \mathbf{M}\|_F &\leq (1-\eta)^2 \|\mathbf{U}_{k+T_1} \mathbf{V}_{k+T_1}^\top - \mathbf{M}\|_F \\ &\quad + (\eta - \eta^2)(1 - \chi_{k+T_1})^k \frac{\|\mathcal{V}_{* \perp}^\top \mathbf{V}_0\|_F}{\|\mathbf{U}_0 \mathbf{V}_0^\top\|_F} \|\mathbf{M}\|_F \mathfrak{L}_v + \eta(1 - \chi_{k+T_1})^k \frac{\|\mathcal{U}_{* \perp}^\top \mathbf{U}_0\|_F}{\|\mathbf{U}_0 \mathbf{V}_0^\top\|_F} \|\mathbf{M}\|_F \mathfrak{L}_u \\ &\leq (2\eta - \eta^2) \sum_{i=1}^k (1-\eta)^{2i} (1 - \chi_{k+T_1})^{k-i} C_\zeta \|\mathbf{M}\|_F + (1-\eta)^{2(k+T_1)} \|\mathbf{U}_0 \mathbf{V}_0^\top - \mathbf{M}\|_F \\ &\leq (1 - \chi_{k+T_1})^k C_\zeta \|\mathbf{M}\|_F + (1 - \chi_{k+T_1})^k \|\mathbf{U}_0 \mathbf{V}_0^\top - \mathbf{M}\|_F \\ &\leq \alpha_1 (1 - \chi_{k+T_1})^k \|\mathbf{M}\|_F \end{aligned} \quad (113)$$

where  $\chi_{k+T_1} \leq \eta$  is monotonically increasing from  $\frac{\eta^2}{(2-\eta)^2}$  to  $\eta$ ,  $C_\zeta = \max\{\frac{\|\mathcal{U}_{* \perp}^\top \mathbf{U}_0\|_F}{\|\mathbf{U}_0 \mathbf{V}_0^\top\|_F}, \frac{\|\mathcal{V}_{* \perp}^\top \mathbf{V}_0\|_F}{\|\mathbf{U}_0 \mathbf{V}_0^\top\|_F}\}$  and  $\alpha_1 = \max\{C_\zeta, \frac{\|\mathbf{U}_0 \mathbf{V}_0^\top - \mathbf{M}\|_F}{\|\mathbf{M}\|_F}\}$ , thus we finish the proof.  $\square$

**Theorem 4** (Small initialization). *Let  $\mathbf{U}_0 \in \mathbb{R}^{m \times d}$  and  $\mathbf{V}_0 \in \mathbb{R}^{n \times d}$  be random Gaussian that follow  $\mathcal{N}(0, \sigma)$ , with  $\sigma \leq c_{\text{init}}$ ,  $\mathbf{U}_k, \mathbf{V}_k$  are updated by Eq. (2) then we have that the objective function of LRMF problem decreases linearly, namely*

$$\|\mathbf{U}_k \mathbf{V}_k^\top - \mathbf{M}\|_F \leq \alpha_2 (1 - \eta)^k \|\mathbf{M}\|_F \quad (114)$$

where  $0 < \eta \leq 1$  is the step size,  $\alpha_2$  is a constant and  $c_{\text{init}}$  is a small constant.

*Proof.* Let  $c_{\text{init}}$  be small enough such that  $\langle \mathbf{U}_0 \mathbf{V}_0^\top, \mathbf{M} \rangle \geq \|\mathbf{U}_0 \mathbf{V}_0^\top\|_F^2$ . According to Lemma 12 the following holds

$$\langle \mathbf{U}_k \mathbf{V}_k^\top, \mathbf{M} \rangle \geq \|\mathbf{U}_k \mathbf{V}_k^\top\|_F^2, \forall k. \quad (115)$$

together with Eq. (98), we can prove that  $\|\mathbf{U}_{k+1} \mathbf{V}_{k+1}^\top\|_F^2 \geq \|\mathbf{U}_k \mathbf{V}_k^\top\|_F^2$  and similarly  $\|\mathbf{U}_{k+1} \mathbf{V}_{k+1}^\top\|_F^2 \geq \|\mathbf{U}_{k+1} \mathbf{V}_k^\top\|_F^2$ , which yields

$$\|\mathbf{U}_{k+1} \mathbf{V}_{k+1}^\top\|_F \geq \|\mathbf{U}_k \mathbf{V}_k^\top\|_F. \quad (116)$$

According to Eq. (104), Eq. (105) and Eq. (116) we have

$$\frac{\|\mathcal{U}_{* \perp}^\top \mathbf{U}_k\|_F}{\|\mathbf{U}_k \mathbf{V}_k^\top\|_F} \leq (1 - \eta) \frac{\|\mathcal{U}_{* \perp}^\top \mathbf{U}_{k-1}\|_F}{\|\mathbf{U}_{k-1} \mathbf{V}_{k-1}^\top\|_F}, \quad (117)$$

and

$$\frac{\|\mathcal{V}_{* \perp}^\top \mathbf{V}_k\|_F}{\|\mathbf{U}_k \mathbf{V}_k^\top\|_F} \leq (1 - \eta) \frac{\|\mathcal{V}_{* \perp}^\top \mathbf{V}_{k-1}\|_F}{\|\mathbf{U}_{k-1} \mathbf{V}_{k-1}^\top\|_F}. \quad (118)$$

together with Eq. (102) and Eq. (173), we are guarantee to prove

$$\begin{aligned} \|\mathbf{U}_{k+1} \mathbf{V}_{k+1}^\top - \mathbf{M}\|_F &\leq (1 - \eta)^2 \|\mathbf{U}_k \mathbf{V}_k^\top - \mathbf{M}\|_F + (\eta - \eta^2)(1 - \eta)^k \frac{\|\mathcal{V}_{* \perp}^\top \mathbf{V}_0\|_F}{\|\mathbf{U}_0 \mathbf{V}_0^\top\|_F} \|\mathbf{M}\|_F \mathfrak{L}_v \\ &\quad + \eta(1 - \eta)^k \frac{\|\mathcal{U}_{* \perp}^\top \mathbf{U}_0\|_F}{\|\mathbf{U}_0 \mathbf{V}_0^\top\|_F} \|\mathbf{M}\|_F \mathfrak{L}_u \\ &\leq (2\eta - \eta^2) \sum_{i=1}^k (1 - \eta)^{2i} (1 - \eta)^{k-i} C_\zeta \|\mathbf{M}\|_F + (1 - \eta)^{2k} \|\mathbf{U}_0 \mathbf{V}_0^\top - \mathbf{M}\|_F \\ &\leq (1 - \eta)^k C_\zeta \|\mathbf{M}\|_F + (1 - \eta)^k \|\mathbf{U}_0 \mathbf{V}_0^\top - \mathbf{M}\|_F \\ &\leq \alpha_2 (1 - \eta)^k \|\mathbf{M}\|_F \end{aligned} \quad (119)$$

where  $C_\zeta = \max\{\frac{\|\mathcal{U}_{* \perp}^\top \mathbf{U}_0\|_F}{\|\mathbf{U}_0 \mathbf{V}_0^\top\|_F}, \frac{\|\mathcal{V}_{* \perp}^\top \mathbf{V}_0\|_F}{\|\mathbf{U}_0 \mathbf{V}_0^\top\|_F}\}$  and  $\alpha_2 = \max\{C_\zeta, \frac{\|\mathbf{U}_0 \mathbf{V}_0^\top - \mathbf{M}\|_F}{\|\mathbf{M}\|_F}\}$ . We thus finish the proof.  $\square$

### 2.3 Lemmas and some preliminary results.

**Lemma 8.** For the ScaledGD (1), if  $\langle \mathbf{U}_k \mathbf{V}_k^\top, \mathbf{M} \rangle \geq \|\mathbf{U}_k \mathbf{V}_k^\top\|_F^2$ , then the following holds

$$\frac{\|\mathcal{U}_{* \perp}^\top \mathbf{U}_{k+1}\|_F}{\|\mathbf{U}_{k+1} \mathbf{V}_{k+1}^\top\|_F} \leq (1 - \eta) \frac{\|\mathcal{U}_{* \perp}^\top \mathbf{U}_k\|_F}{\|\mathbf{U}_k \mathbf{V}_k^\top\|_F}, \quad \frac{\|\mathcal{V}_{* \perp}^\top \mathbf{V}_{k+1}\|_2}{\|\mathbf{U}_{k+1} \mathbf{V}_{k+1}^\top\|_F} \leq (1 - \eta) \frac{\|\mathcal{V}_{* \perp}^\top \mathbf{V}_k\|_F}{\|\mathbf{U}_k \mathbf{V}_k^\top\|_F} \quad (120)$$

*Proof.* Since  $\mathbf{U}_{k+1} = (1 - \eta)\mathbf{U}_k + \eta \mathbf{M} \mathbf{V}_k (\mathbf{V}_k^\top \mathbf{V}_k)^{-1}$ , it is obvious that

$$\frac{\|\mathcal{U}_{* \perp}^\top \mathbf{U}_{k+1}\|_F}{\|\mathbf{U}_{k+1} \mathbf{V}_{k+1}^\top\|_F} = (1 - \eta) \frac{\|\mathcal{U}_{* \perp}^\top \mathbf{U}_k\|_F}{\|\mathbf{U}_k \mathbf{V}_k^\top\|_F} \cdot \frac{\|\mathbf{U}_k \mathbf{V}_k^\top\|_F}{\|\mathbf{U}_{k+1} \mathbf{V}_{k+1}^\top\|_F}. \quad (121)$$

Since  $\langle \mathbf{U}_k \mathbf{V}_k^\top, \mathbf{M} \rangle \geq \|\mathbf{U}_k \mathbf{V}_k^\top\|_F^2$ , according to Lemma 17 we know that  $\frac{\|\mathbf{U}_k \mathbf{V}_k^\top\|_F}{\|\mathbf{U}_{k+1} \mathbf{V}_{k+1}^\top\|_F} \leq 1$ , which guarantees that  $\frac{\|\mathcal{U}_{* \perp}^\top \mathbf{U}_{k+1}\|_F}{\|\mathbf{U}_{k+1} \mathbf{V}_{k+1}^\top\|_F} \leq (1 - \eta) \frac{\|\mathcal{U}_{* \perp}^\top \mathbf{U}_k\|_F}{\|\mathbf{U}_k \mathbf{V}_k^\top\|_F}$ .

Meanwhile,  $\mathbf{V}_{k+1} = (1 - \eta)\mathbf{V}_k + \eta \mathbf{M}^\top \mathbf{U}_k (\mathbf{U}_k^\top \mathbf{U}_k)^{-1}$ , we have

$$\frac{\|\mathcal{V}_{* \perp}^\top \mathbf{V}_{k+1}\|_2}{\|\mathbf{U}_{k+1} \mathbf{V}_{k+1}^\top\|_F} \leq (1 - \eta) \frac{\|\mathcal{V}_{* \perp}^\top \mathbf{V}_k\|_F}{\|\mathbf{U}_k \mathbf{V}_k^\top\|_F} \cdot \frac{\|\mathbf{U}_k \mathbf{V}_k^\top\|_F}{\|\mathbf{U}_{k+1} \mathbf{V}_{k+1}^\top\|_F}, \quad (122)$$

similarly we can also guarantee that  $\frac{\|\mathcal{V}_{* \perp}^\top \mathbf{V}_{k+1}\|_2}{\|\mathbf{U}_{k+1} \mathbf{V}_{k+1}^\top\|_F} \leq (1 - \eta) \frac{\|\mathcal{V}_{* \perp}^\top \mathbf{V}_k\|_F}{\|\mathbf{U}_k \mathbf{V}_k^\top\|_F}$ . Thus, we finish the proof.  $\square$

**Theorem 6.** (Convergence of the matrix norm) For the ScaledGD (1), if  $\langle \mathbf{U}_0 \mathbf{V}_0^\top, \mathbf{M} \rangle \geq \|\mathbf{U}_0 \mathbf{V}_0^\top\|_F^2$ , then we have

$$\|\mathbf{M}\|_F - \|\mathbf{U}_{k+1} \mathbf{V}_{k+1}^\top\|_F \leq (1 - \eta)^k C_\alpha, \forall k \geq 0 \quad (123)$$

where  $C_\alpha$  is a constant and  $\eta$  is the step length  $0 \leq \eta < 1$ .

*Proof.* By ScaledGD Eq. (1), we have

$$\begin{aligned} \frac{\|\mathbf{U}_{k+1} \mathbf{V}_{k+1}^\top\|_F^2}{\|\mathbf{M}\|_F^2} &= (1 - \eta)^2 \frac{\|\mathbf{U}_k \mathbf{V}_k^\top\|_F^2}{\|\mathbf{M}\|_F^2} + 2\eta(1 - \eta) \frac{\langle \mathbf{U}_k \mathbf{V}_k^\top, \mathbf{M} \rangle}{\|\mathbf{M}\|_F^2} + \eta^2 \frac{\|\mathbf{M} \mathbf{V}_k\|_F^2}{\|\mathbf{M}\|_F^2} \\ &\geq (1 - \eta^2) \frac{\|\mathbf{U}_k \mathbf{V}_k^\top\|_F^2}{\|\mathbf{M}\|_F^2} + \eta^2 \cos^2 \theta_k^v \end{aligned} \quad (124)$$

the second inequality is due to  $\langle \mathbf{U}_k \mathbf{V}_k^\top, \mathbf{M} \rangle \geq \|\mathbf{U}_k \mathbf{V}_k^\top\|_F^2$ . In consequence,

$$\begin{aligned} \frac{\|\mathbf{U}_{k+1} \mathbf{V}_{k+1}^\top\|_F^2}{\|\mathbf{M}\|_F^2} &\geq \frac{\|\mathbf{U}_{k+1} \mathbf{V}_k^\top\|_F^2}{\|\mathbf{M}\|_F^2} \geq (1-\eta^2) \frac{\|\mathbf{U}_k \mathbf{V}_k^\top\|_F^2}{\|\mathbf{M}\|_F^2} + \eta^2 \cos^2 \theta_k^v \\ &\geq (1-\eta) \frac{\|\mathbf{U}_k \mathbf{V}_k^\top\|_F^2}{\|\mathbf{M}\|_F^2} + \eta^2 \cos^2 \theta_k^v \end{aligned} \quad (125)$$

where we define

$$\cos \theta_k^v = \frac{\|\mathbf{M} \mathcal{V}_k\|_F}{\|\mathbf{M}\|_F}, \cos \theta_k^u = \frac{\|\mathcal{U}_k^\top \mathbf{M}\|_F}{\|\mathbf{M}\|_F}$$

In consequence, one obtains

$$1 - \frac{\|\mathbf{U}_{k+1} \mathbf{V}_{k+1}^\top\|_F^2}{\|\mathbf{M}\|_F^2} \leq (1-\eta) \left(1 - \frac{\|\mathbf{U}_k \mathbf{V}_k^\top\|_F^2}{\|\mathbf{M}\|_F^2}\right) + \eta(1 - \cos^2 \theta_k^v), \quad (126)$$

Meanwhile, according to Lemma 8, Lemma 11 and Lemma 15, we have

$$\frac{\|\mathcal{U}_{k\perp}^\top \mathbf{M}\|_F}{\|\mathbf{M}\|_F} \leq (1-\eta)^k C_u, \frac{\|\mathbf{M} \mathcal{V}_{k\perp}\|_F}{\|\mathbf{M}\|_F} \leq (1-\eta)^k C_v, \forall k > 0 \quad (127)$$

As

$$\cos^2 \theta_k^u = 1 - \frac{\|\mathcal{U}_{k\perp}^\top \mathbf{M}\|_F^2}{\|\mathbf{M}\|_F^2}, \cos^2 \theta_k^v = 1 - \frac{\|\mathbf{M} \mathcal{V}_{k\perp}\|_F^2}{\|\mathbf{M}\|_F^2}$$

which guarantees that

$$1 - \cos^2 \theta_k^v \leq (1-\eta)^{2k} C_v$$

Together with Eq. (126), the following inequality holds

$$\begin{aligned} 1 - \frac{\|\mathbf{U}_{k+1} \mathbf{V}_{k+1}^\top\|_F^2}{\|\mathbf{M}\|_F^2} &\leq \eta^2 \sum_{i=1}^k (1-\eta)^i (1 - \cos^2 \theta_v^{k-i}) + (1-\eta)^k \left(1 - \frac{\|\mathbf{U}_0 \mathbf{V}_0^\top\|_F^2}{\|\mathbf{M}\|_F^2}\right) \\ &\leq \eta^2 \sum_{i=1}^k (1-\eta)^i (1-\eta)^{2(k-i)} C_v + (1-\eta)^k \left(1 - \frac{\|\mathbf{U}_0 \mathbf{V}_0^\top\|_F^2}{\|\mathbf{M}\|_F^2}\right) \\ &\leq (1-\eta)^k C_{\alpha_1}, \end{aligned} \quad (128)$$

where  $C_{\alpha_1} = \max \left\{ C_v \eta^2, 1 - \frac{\|\mathbf{U}_0 \mathbf{V}_0^\top\|_F^2}{\|\mathbf{M}\|_F^2} \right\}$ , which further implies that

$$\|\mathbf{M}\|_F - \frac{\|\mathbf{U}_{k+1} \mathbf{V}_{k+1}^\top\|_F}{\|\mathbf{M}\|_F} \leq (1-\eta)^k C_{\alpha_1} \frac{\|\mathbf{M}\|_F^2}{\|\mathbf{M}\|_F + \|\mathbf{U}_k \mathbf{V}_k^\top\|_F} \leq (1-\eta)^k C_\alpha. \quad (129)$$

thus we finish our proof.  $\square$

**Lemma 9.** Let  $\eta \leq c_\eta < 1$  with  $c_\eta$  a small constant, if  $\langle \mathbf{U}_0 \mathbf{V}_0^\top, \mathbf{M} \rangle \geq \|\mathbf{U}_0 \mathbf{V}_0^\top\|_F^2$  then the following is true

$$\langle \mathbf{U}_k \mathbf{V}_k^\top, \mathbf{M} \rangle \geq \|\mathbf{U}_k \mathbf{V}_k^\top\|_F^2, \forall k > 0. \quad (130)$$

*Proof.* We prove this result by induction. Since  $\langle \mathbf{U}_0 \mathbf{V}_0^\top, \mathbf{M} \rangle \geq \|\mathbf{U}_0 \mathbf{V}_0^\top\|_F^2$ , we assume that  $\langle \mathbf{U}_{k-1} \mathbf{V}_{k-1}^\top, \mathbf{M} \rangle \geq \|\mathbf{U}_{k-1} \mathbf{V}_{k-1}^\top\|_F^2$ , then we need to prove  $\langle \mathbf{U}_k \mathbf{V}_k^\top, \mathbf{M} \rangle \geq \|\mathbf{U}_k \mathbf{V}_k^\top\|_F^2$ . We first show that

$$\begin{aligned} \|\mathbf{U}_k \mathbf{V}_k^\top\|_F^2 &= (1-\eta)^2 \|\mathbf{U}_k \mathbf{V}_{k-1}^\top\|_F^2 + 2\eta(1-\eta) \langle \mathbf{U}_k \mathbf{V}_{k-1}^\top, \mathbf{U}_k (\mathbf{U}_{k-1}^\top \mathbf{U}_{k-1})^{-1} \mathbf{U}_{k-1}^\top \mathbf{M} \rangle \\ &\quad + \eta^2 \|\mathbf{U}_k (\mathbf{U}_{k-1}^\top \mathbf{U}_{k-1})^{-1} \mathbf{U}_{k-1}^\top \mathbf{M}\|_F^2 \\ &\leq \|\mathbf{U}_k \mathbf{V}_{k-1}^\top\|_F^2 \left(1 - \eta + \eta \frac{\|\mathbf{U}_k (\mathbf{U}_{k-1}^\top \mathbf{U}_{k-1})^{-1} \mathbf{U}_{k-1}^\top \mathbf{M}\|_F}{\|\mathbf{U}_k \mathbf{V}_{k-1}^\top\|_F}\right)^2 \\ &= \underbrace{\|\mathbf{M}\|_F^2 \frac{\|\mathbf{U}_k \mathbf{V}_{k-1}^\top\|_F^2}{\|\mathbf{M}\|_F^2}}_{\mathfrak{M}} \left(1 - \eta + \eta \frac{\|\mathbf{U}_k (\mathbf{U}_{k-1}^\top \mathbf{U}_{k-1})^{-1} \mathbf{U}_{k-1}^\top \mathbf{M}\|_F}{\|\mathbf{U}_k \mathbf{V}_{k-1}^\top\|_F}\right)^2 \end{aligned} \quad (131)$$

To prove the result in Eq. (130), we need to guarantee that  $\mathfrak{M} \leq \frac{\langle \mathbf{M}, \mathbf{U}_k \mathbf{V}_k^\top \rangle}{\|\mathbf{M}\|_F^2}$ , which is equivalent to ensure that

$$(1 - \eta) \frac{\|\mathbf{U}_k \mathbf{V}_{k-1}^\top\|_F}{\|\mathbf{M}\|_F} + \eta \frac{\|\mathbf{U}_k (\mathbf{U}_{k-1}^\top \mathbf{U}_{k-1})^{-1} \mathbf{U}_{k-1}^\top \mathbf{M}\|_F}{\|\mathbf{M}\|_F} \leq \frac{\sqrt{\langle \mathbf{M}, \mathbf{U}_k \mathbf{V}_k^\top \rangle}}{\|\mathbf{M}\|_F} \quad (132)$$

Meanwhile, since  $\langle \mathbf{U}_{k-1} \mathbf{V}_{k-1}^\top, \mathbf{M} \rangle \geq \|\mathbf{U}_{k-1} \mathbf{V}_{k-1}^\top\|_F^2$ , and

$$\begin{aligned} \|\mathbf{U}_k \mathbf{V}_{k-1}^\top\|_F^2 &= \|(1 - \eta) \mathbf{U}_{k-1} \mathbf{V}_{k-1}^\top + \eta \mathbf{M} \mathcal{V}_{k-1} \mathcal{V}_{k-1}^\top\|_F^2 \\ &= (1 - \eta)^2 \|\mathbf{U}_{k-1} \mathbf{V}_{k-1}^\top\|_F^2 + 2\eta(1 - \eta) \langle \mathbf{U}_{k-1} \mathbf{V}_{k-1}^\top, \mathbf{M} \rangle + \eta^2 \|\mathbf{M} \mathcal{V}_{k-1}\|_F^2 \end{aligned} \quad (133)$$

it is easy to verify

$$\begin{aligned} \|\mathbf{U}_k \mathbf{V}_{k-1}^\top\|_F^2 &\leq (1 - \eta^2) \langle \mathbf{U}_{k-1} \mathbf{V}_{k-1}^\top, \mathbf{M} \rangle + \eta^2 \|\mathbf{M} \mathcal{V}_{k-1}\|_F^2 \\ &= (1 - \eta) \langle \mathbf{U}_{k-1} \mathbf{V}_{k-1}^\top, \mathbf{M} \rangle + (\eta - \eta^2) \langle \mathbf{U}_{k-1} \mathbf{V}_{k-1}^\top, \mathbf{M} \rangle + \eta^2 \|\mathbf{M} \mathcal{V}_{k-1}\|_F^2 \\ &\leq (1 - \eta) \langle \mathbf{U}_{k-1} \mathbf{V}_{k-1}^\top, \mathbf{M} \rangle + (\eta - \eta^2) \|\mathbf{M} \mathcal{V}_{k-1}\|_F^2 + \eta^2 \|\mathbf{M} \mathcal{V}_{k-1}\|_F^2 \\ &= \langle \mathbf{U}_k \mathbf{V}_{k-1}^\top, \mathbf{M} \rangle, \end{aligned} \quad (134)$$

where the second inequality is due to Lemma 13. In consequence, one can verify that

$$\langle \mathbf{M}, \mathbf{U}_k \mathbf{V}_k^\top \rangle \geq \langle \mathbf{M}, \mathbf{U}_k \mathbf{V}_{k-1}^\top \rangle \geq \|\mathbf{U}_k \mathbf{V}_{k-1}^\top\|_F^2, \quad (135)$$

as

$$\begin{aligned} \langle \mathbf{M}, \mathbf{U}_k \mathbf{V}_k^\top - \mathbf{U}_k \mathbf{V}_{k-1}^\top \rangle &= \langle \mathbf{M}, \mathbf{U}_k (\mathbf{U}_{k-1}^\top \mathbf{U}_{k-1})^{-1} \mathbf{U}_{k-1}^\top \mathbf{M} \rangle - \langle \mathbf{M}, \mathbf{U}_{k-1} \mathbf{V}_{k-1}^\top \rangle \\ &\geq \langle \mathbf{M}, \mathbf{U}_{k-1} (\mathbf{U}_{k-1}^\top \mathbf{U}_{k-1})^{-1} \mathbf{U}_{k-1}^\top \mathbf{M} \rangle - \langle \mathbf{M}, \mathbf{U}_{k-1} \mathbf{V}_{k-1}^\top \rangle, \\ &\geq 0 \end{aligned} \quad (136)$$

which is due to Lemma 13.

Denote by

$$\mathfrak{Z} = \frac{\sqrt{\langle \mathbf{M}, \mathbf{U}_k \mathbf{V}_k^\top \rangle} - \|\mathbf{U}_k \mathbf{V}_{k-1}^\top\|_F}{\|\mathbf{U}_k (\mathbf{U}_{k-1}^\top \mathbf{U}_{k-1})^{-1} \mathbf{U}_{k-1}^\top \mathbf{M}\|_F - \|\mathbf{U}_{k-1} \mathbf{V}_{k-1}^\top\|_F} \quad (137)$$

then it can be easily verified that  $\mathfrak{Z} > 0$ . As a result

$$\mathfrak{Z} (\|\mathbf{U}_k (\mathbf{U}_{k-1}^\top \mathbf{U}_{k-1})^{-1} \mathbf{U}_{k-1}^\top \mathbf{M}\|_F - \|\mathbf{U}_{k-1} \mathbf{V}_{k-1}^\top\|_F) = \sqrt{\langle \mathbf{M}, \mathbf{U}_k \mathbf{V}_k^\top \rangle} - \|\mathbf{U}_k \mathbf{V}_{k-1}^\top\|_F \quad (138)$$

If  $\eta \leq c_\eta < \mathfrak{Z}$  with  $c_\eta$  sufficiently small, then we can guarantee that

$$\begin{aligned} &\eta (\|\mathbf{U}_k (\mathbf{U}_{k-1}^\top \mathbf{U}_{k-1})^{-1} \mathbf{U}_{k-1}^\top \mathbf{M}\|_F - \|\mathbf{U}_k \mathbf{V}_{k-1}^\top\|_F) \\ &\leq \eta (\|\mathbf{U}_k (\mathbf{U}_{k-1}^\top \mathbf{U}_{k-1})^{-1} \mathbf{U}_{k-1}^\top \mathbf{M}\|_F - \|\mathbf{U}_{k-1} \mathbf{V}_{k-1}^\top\|_F) \\ &\leq \mathfrak{Z} (\|\mathbf{U}_k (\mathbf{U}_{k-1}^\top \mathbf{U}_{k-1})^{-1} \mathbf{U}_{k-1}^\top \mathbf{M}\|_F - \|\mathbf{U}_{k-1} \mathbf{V}_{k-1}^\top\|_F) \\ &= \sqrt{\langle \mathbf{M}, \mathbf{U}_k \mathbf{V}_k^\top \rangle} - \|\mathbf{U}_k \mathbf{V}_{k-1}^\top\|_F \end{aligned} \quad (139)$$

By simple reformulation, one obtains

$$(1 - \eta) \frac{\|\mathbf{U}_k \mathbf{V}_{k-1}^\top\|_F}{\|\mathbf{M}\|_F} + \eta \frac{\|\mathbf{U}_k (\mathbf{U}_{k-1}^\top \mathbf{U}_{k-1})^{-1} \mathbf{U}_{k-1}^\top \mathbf{M}\|_F}{\|\mathbf{M}\|_F} \leq \frac{\sqrt{\langle \mathbf{M}, \mathbf{U}_k \mathbf{V}_k^\top \rangle}}{\|\mathbf{M}\|_F} \quad (140)$$

which is exactly the inequality we need in Eq. (132), thus we finish the proof.  $\square$

**Lemma 10.** *Let us define*

$$\cos \theta_k^v = \frac{\|\mathbf{M} \mathcal{V}_k\|_F}{\|\mathbf{M}\|_F}, \cos \theta_k^u = \frac{\|\mathcal{U}_k^\top \mathbf{M}\|_F}{\|\mathbf{M}\|_F}, \quad (141)$$

then after  $T_1 = O(\ln \frac{d}{\delta})$  iterations of ScaledGD, the following inequalities hold

$$\frac{\|\mathcal{U}_{* \perp}^\top \mathbf{U}_{k+T_1+1}\|_F}{\|\mathbf{U}_{k+T_1+1} \mathbf{V}_{k+T_1+1}^\top\|_F} \leq (1 - \chi_{k+T_1}) \frac{\|\mathcal{U}_{* \perp}^\top \mathbf{U}_{k+T_1}\|_F}{\|\mathbf{U}_{k+T_1} \mathbf{V}_{k+T_1}^\top\|_F}, \forall k > 0. \quad (142)$$

$$\frac{\|\mathcal{V}_{* \perp}^\top \mathbf{V}_{k+T_1+1}\|_F}{\|\mathbf{U}_{k+T_1+1} \mathbf{V}_{k+T_1+1}^\top\|_F} \leq (1 - \chi_{k+T_1}) \frac{\|\mathcal{V}_{* \perp}^\top \mathbf{V}_{k+T_1}\|_F}{\|\mathbf{U}_{k+T_1} \mathbf{V}_{k+T_1}^\top\|_F}, \forall k > 0. \quad (143)$$

$$1 - \cos \theta_{k+T_1+1}^u \cos \theta_{k+T_1+1}^v \leq (1 - \chi_{k+T_1})^{2k} (1 - C_u C_v), \forall k > 0. \quad (144)$$

where  $\chi_{k+T_1} = \frac{\eta^2(1-\tau_{k+T_1})^2 + 2\eta\tau_{k+T_1} - \eta}{(1-\eta+\eta\tau_{k+T_1})^2} > 0$ ,  $\tau_{k+T_1} = \frac{\langle \mathbf{U}_{k+T_1} \mathbf{V}_{k+T_1}^\top, \mathbf{M} \rangle}{\|\mathbf{U}_{k+T_1} \mathbf{V}_{k+T_1}^\top\|_F^2} \in [1/2, 1]$ .

*Proof.* According to the analysis in the proof of the Theorem 1 and Eq. (84), we know that after  $T_1$  iterations, we have

$$\|\mathbf{U}_{k+T_1} \mathbf{V}_{k+T_1}^\top - \mathbf{M}\|_F \leq \|\mathbf{M}\|_F, \forall k \geq 0, \quad (145)$$

which implies

$$\tau_{k+T_1} = \frac{\langle \mathbf{U}_{k+T_1} \mathbf{V}_{k+T_1}^\top, \mathbf{M} \rangle}{\|\mathbf{U}_{k+T_1} \mathbf{V}_{k+T_1}^\top\|_F^2} \geq 1/2 \quad (146)$$

Since the results for  $\tau_{k+T_1} \geq 1$  is easy to analyze according to Lemma 8, therefore we mainly focus on  $1 \geq \tau_{k+T_1} \geq 1/2$ .

According to the results in Lemma 18, if  $1 \geq \tau_{k+T_1} \geq 1/2$ , we have

$$\frac{\|\mathbf{U}_{k+T_1} \mathbf{V}_{k+T_1}^\top\|_F}{\|\mathbf{U}_{k+T_1+1} \mathbf{V}_{k+T_1+1}^\top\|_F} \leq \frac{1}{(1 - \eta + \eta\tau_{k+T_1})^2} \quad (147)$$

therefore,

$$\begin{aligned} \frac{\|\mathcal{U}_{* \perp}^\top \mathbf{U}_{k+T_1+1}\|_F}{\|\mathbf{U}_{k+T_1+1} \mathbf{V}_{k+T_1+1}^\top\|_F} &= (1 - \eta) \frac{\|\mathcal{U}_{* \perp}^\top \mathbf{U}_{k+T_1}\|_F}{\|\mathbf{U}_{k+T_1} \mathbf{V}_{k+T_1}^\top\|_F} \cdot \frac{\|\mathbf{U}_{k+T_1} \mathbf{V}_{k+T_1}^\top\|_F}{\|\mathbf{U}_{k+T_1+1} \mathbf{V}_{k+T_1+1}^\top\|_F} \\ &\leq \frac{(1 - \eta)}{(1 - \eta + \eta\tau_{k+T_1})^2} \frac{\|\mathcal{U}_{* \perp}^\top \mathbf{U}_{k+T_1}\|_F}{\|\mathbf{U}_{k+T_1} \mathbf{V}_{k+T_1}^\top\|_F} \\ &= (1 - \chi_{k+T_1}) \frac{\|\mathcal{U}_{* \perp}^\top \mathbf{U}_{k+T_1}\|_F}{\|\mathbf{U}_{k+T_1} \mathbf{V}_{k+T_1}^\top\|_F} \end{aligned} \quad (148)$$

with  $\chi_{k+T_1} = \frac{\eta^2(1-\tau_{k+T_1})^2 + 2\eta\tau_{k+T_1} - \eta}{(1-\eta+\eta\tau_{k+T_1})^2}$  and  $0 < \chi_{k+T_1} < 1$  when  $1 \geq \tau_{k+T_1} \geq 1/2$ .

In the same way, we can prove

$$\frac{\|\mathcal{V}_{* \perp}^\top \mathbf{V}_{k+T_1+1}\|_F}{\|\mathbf{U}_{k+T_1+1} \mathbf{V}_{k+T_1+1}^\top\|_F} \leq (1 - \chi_{k+T_1}) \frac{\|\mathcal{V}_{* \perp}^\top \mathbf{V}_{k+T_1}\|_F}{\|\mathbf{U}_{k+T_1} \mathbf{V}_{k+T_1}^\top\|_F}, \forall k > 0 \quad (149)$$

with  $\chi_{k+T_1} = \frac{\eta^2(1-\tau_{k+T_1})^2 + 2\eta\tau_{k+T_1} - \eta}{(1-\eta+\eta\tau_{k+T_1})^2}$  and  $0 < \chi_{k+T_1} < 1$ .

According to Lemma 15, we know that there exists bounded value  $0 < \mathfrak{b}$  such that

$$\frac{\|\mathcal{U}_{* \perp}^\top \mathbf{U}_k\|_F}{\|\mathbf{U}_k \mathbf{V}_k^\top\|_F} \leq \mathfrak{b} \frac{\|\mathcal{U}_{* \perp}^\top \mathbf{M}\|_F}{\|\mathbf{M}\|_F}, \forall k \geq 0.$$

Together with Lemma 11, Eq. (148) and Eq. (149), we have

$$\frac{\|\mathcal{U}_{k+T_1+1 \perp}^\top \mathbf{M}\|_F}{\|\mathbf{M}\|_F} \leq (1 - \chi_{k+T_1})^k C_u, \forall k > 0 \quad (150)$$

for bounded constant  $C_u$ . The same is true for  $\mathbf{V}$  as

$$\frac{\|\mathbf{M} \mathcal{V}_{k+T_1+1 \perp}\|_F}{\|\mathbf{M}\|_F} \leq (1 - \chi_{k+T_1})^k C_v, \forall k > 0 \quad (151)$$



for bounded  $C_v$ . One can simply assume that  $C_u \leq 1$  and  $C_v \leq 1$ , since  $(1 - \chi_{k+T_1})^k C_u = (1 - \chi_{k+T_1})^{k_1} (1 - \chi_{k+T_1})^{k_2} C_u$  such that  $(1 - \chi_{k+T_1})^{k_2} C_u \leq 1$ .

As

$$\cos^2 \theta_k^u = 1 - \frac{\|\mathcal{U}_{k\perp}^\top \mathbf{M}\|_F^2}{\|\mathbf{M}\|_F^2}, \cos^2 \theta_k^v = 1 - \frac{\|\mathbf{M} \mathcal{V}_{k\perp}\|_F^2}{\|\mathbf{M}\|_F^2}$$

together with Eq. (150) and Eq. (151) one obtains

$$\begin{aligned} \cos^2 \theta_{k+T_1+1}^u &\geq 1 - (1 - \chi_{k+T_1})^{2k} C_u^2 = (1 - (1 - \chi_{k+T_1})^{2k}) + (1 - \chi_{k+T_1})^{2k} (1 - C_u^2) \\ \cos^2 \theta_{k+T_1+1}^v &\geq 1 - (1 - \chi_{k+T_1})^{2k} C_v^2 = (1 - (1 - \chi_{k+T_1})^{2k}) + (1 - \chi_{k+T_1})^{2k} (1 - C_v^2) \end{aligned}$$

consequently, we have

$$1 - \cos \theta_{k+T_1+1}^u \cos \theta_{k+T_1+1}^v \leq (1 - \chi_{k+T_1})^{2k} (1 - C_u C_v)$$

□

**Lemma 11.** Let  $\{x_k\}_{k=1}^\infty$  and  $\{y_k\}_{k=1}^\infty$  be two sequences such that  $x_k \leq (1 - \zeta)x_{k-1}$  with  $0 \leq \zeta \leq 1$ , and

$$\alpha x_k \leq y_k \leq \beta x_k, \forall k$$

then we have that

$$y_k \leq (1 - \zeta)^k c_0, \forall k > 0,$$

where  $c_0 = \beta x_0$  and  $\alpha, \beta$  are bounded positive values.

*Proof.* The proof is trivial since  $x_k \leq (1 - \zeta)^k x_0$ , thus  $(1 - \zeta)^k \alpha x_0 \leq y_k \leq (1 - \zeta)^k \beta x_0$ . □

**Lemma 12.** If there exists  $t \in \mathbb{N}_+$  such that  $\mathbf{U}_t$  and  $\mathbf{V}_t \in \mathbb{R}^{n \times r}$  in Eq. (2) satisfy  $\langle \mathbf{U}_t \mathbf{V}_t^\top, \mathbf{M} \rangle \geq \|\mathbf{U}_t \mathbf{V}_t^\top\|_F^2$ , then we have

$$\langle \mathbf{U}_{k+t} \mathbf{V}_{k+t}^\top, \mathbf{M} \rangle \geq \|\mathbf{U}_{k+t} \mathbf{V}_{k+t}^\top\|_F^2 \quad (152)$$

for any  $k \in \mathbb{N}_+$ .

*Proof.* Without loss of generality, we assume  $t = 0$ , thus we prove the result by induction. We assume that the result is true for  $k$ , then we prove

$$\langle \mathbf{U}_{k+1} \mathbf{V}_{k+1}^\top, \mathbf{M} \rangle \geq \|\mathbf{U}_{k+1} \mathbf{V}_{k+1}^\top\|_F^2. \quad (153)$$

We first need to prove that  $\langle \mathbf{U}_k \mathbf{V}_k^\top, \mathbf{M} \rangle \geq \|\mathbf{U}_k \mathbf{V}_k^\top\|_F^2$  implies  $\langle \mathbf{U}_{k+1} \mathbf{V}_k^\top, \mathbf{M} \rangle \geq \|\mathbf{U}_{k+1} \mathbf{V}_k^\top\|_F^2$ . Note that

$$\begin{aligned} \|\mathbf{U}_{k+1} \mathbf{V}_k^\top\|_F^2 &= \|(1 - \eta) \mathbf{U}_k \mathbf{V}_k^\top + \eta \mathbf{M} \mathcal{V}_k \mathcal{V}_k^\top\|_F^2 \\ &= (1 - \eta)^2 \|\mathbf{U}_k \mathbf{V}_k^\top\|_F^2 + 2\eta(1 - \eta) \langle \mathbf{U}_k \mathbf{V}_k^\top, \mathbf{M} \rangle + \eta^2 \|\mathbf{M} \mathcal{V}_k\|_F^2 \end{aligned} \quad (154)$$

According to Lemma 13 we know  $\langle \mathbf{U}_k \mathbf{V}_k^\top, \mathbf{M} \rangle \leq \|\mathbf{M} \mathcal{V}_k\|_F^2$ , together with  $\langle \mathbf{U}_k \mathbf{V}_k^\top, \mathbf{M} \rangle \geq \|\mathbf{U}_k \mathbf{V}_k^\top\|_F^2$  therefore

$$\begin{aligned} \|\mathbf{U}_{k+1} \mathbf{V}_k^\top\|_F^2 &\leq (1 - \eta^2) \langle \mathbf{U}_k \mathbf{V}_k^\top, \mathbf{M} \rangle + \eta^2 \|\mathbf{M} \mathcal{V}_k\|_F^2 \\ &= (1 - \eta) \langle \mathbf{U}_k \mathbf{V}_k^\top, \mathbf{M} \rangle + (\eta - \eta^2) \langle \mathbf{U}_k \mathbf{V}_k^\top, \mathbf{M} \rangle + \eta^2 \|\mathbf{M} \mathcal{V}_k\|_F^2 \\ &\leq (1 - \eta) \langle \mathbf{U}_k \mathbf{V}_k^\top, \mathbf{M} \rangle + (\eta - \eta^2) \|\mathbf{M} \mathcal{V}_k\|_F^2 + \eta^2 \|\mathbf{M} \mathcal{V}_k\|_F^2 \\ &= \langle \mathbf{U}_{k+1} \mathbf{V}_k^\top, \mathbf{M} \rangle. \end{aligned} \quad (155)$$

Again, according to Lemma 13, we have  $\langle \mathbf{U}_{k+1} \mathbf{V}_k^\top, \mathbf{M} \rangle \leq \|\mathcal{U}_{k+1}^\top \mathbf{M}\|_F^2$ . In the same way, we can prove that

$$\begin{aligned} \|\mathbf{U}_{k+1} \mathbf{V}_{k+1}^\top\|_F^2 &\leq (1 - \eta^2) \langle \mathbf{U}_{k+1} \mathbf{V}_k^\top, \mathbf{M} \rangle + \eta^2 \|\mathcal{U}_{k+1} \mathbf{M}\|_F^2 \\ &= (1 - \eta) \langle \mathbf{U}_{k+1} \mathbf{V}_k^\top, \mathbf{M} \rangle + (\eta - \eta^2) \langle \mathbf{U}_{k+1} \mathbf{V}_k^\top, \mathbf{M} \rangle + \eta^2 \|\mathbf{M} \mathcal{V}_k\|_F^2 \\ &\leq (1 - \eta) \langle \mathbf{U}_{k+1} \mathbf{V}_k^\top, \mathbf{M} \rangle + (\eta - \eta^2) \|\mathcal{U}_{k+1} \mathbf{M}\|_F^2 + \eta^2 \|\mathcal{U}_{k+1} \mathbf{M}\|_F^2 \\ &= \langle \mathbf{U}_{k+1} \mathbf{V}_{k+1}^\top, \mathbf{M} \rangle, \end{aligned} \quad (156)$$

which finishes our proof. □

**Lemma 13.** For any matrix  $\mathbf{A} \in \mathbb{R}^{m \times n}$  and  $\mathbf{B} \in \mathbb{R}^{m \times n}$ , such that  $\langle \mathbf{A}, \mathbf{B} \rangle \geq \|\mathbf{A}\|_F^2$ , then we have

$$\langle \mathbf{A}, \mathbf{B} \rangle \leq \|\mathcal{U}_\mathbf{A}^\top \mathbf{B}\|_F^2, \langle \mathbf{A}, \mathbf{B} \rangle \leq \|\mathbf{B} \mathcal{V}_\mathbf{A}\|_F^2 \quad (157)$$

where  $\mathcal{U}_\mathbf{A}$  is the left singular vector matrix of  $\mathbf{A}$ .

*Proof.* Let  $\mathbf{A} = \mathcal{U}_\mathbf{A} \Sigma_\mathbf{A} \mathcal{V}_\mathbf{A}^\top$  be the SVD of  $\mathbf{A}$ , the following holds

$$\begin{aligned} \langle \mathbf{A}, \mathbf{B} \rangle &= \langle \mathcal{U}_\mathbf{A} \Sigma_\mathbf{A} \mathcal{V}_\mathbf{A}^\top, \mathbf{B} \rangle \\ &= \langle \Sigma_\mathbf{A}, \mathcal{U}_\mathbf{A}^\top \mathbf{B} \mathcal{V}_\mathbf{A} \rangle \\ &\leq \|\mathbf{A}\|_F \|\mathcal{U}_\mathbf{A}^\top \mathbf{B} \mathcal{V}_\mathbf{A}\|_F \\ &\leq \|\mathbf{A}\|_F \|\mathcal{U}_\mathbf{A}^\top \mathbf{B}\|_F \end{aligned} \quad (158)$$

According to  $\langle \mathbf{A}, \mathbf{B} \rangle \geq \|\mathbf{A}\|_F^2$ , we have

$$\begin{aligned} \langle \mathbf{A}, \mathbf{B} \rangle^2 &\leq \|\mathbf{A}\|_F^2 \|\mathcal{U}_\mathbf{A}^\top \mathbf{B}\|_F^2 \\ &\leq \langle \mathbf{A}, \mathbf{B} \rangle \|\mathcal{U}_\mathbf{A}^\top \mathbf{B}\|_F^2 \end{aligned} \quad (159)$$

which implies

$$\langle \mathbf{A}, \mathbf{B} \rangle \leq \|\mathcal{U}_\mathbf{A}^\top \mathbf{B}\|_F^2. \quad (160)$$

□

**Lemma 14.** Let  $\mathbf{U}_k \in \mathbb{R}^{m \times d}$  and  $\mathbf{V}_k \in \mathbb{R}^{n \times d}$  be given by Eq. (1), there exists a bounded constant  $C$  such that

$$\|\mathbf{M} \mathbf{V} (\mathbf{V}^\top \mathbf{V})^{-1} (\mathbf{U}^\top \mathbf{U})^{-1} \mathbf{U}^\top \mathbf{M} - \mathbf{M}\|_F < C \|\mathbf{M}\|_F \left| 1 - \frac{\|\mathbf{M} \mathcal{V}_k\|_F \|\mathcal{U}_k^\top \mathbf{M}\|_F}{\|\mathbf{M}\|_F \|\mathbf{U}_k \mathbf{V}_k^\top\|_F} \right| \quad (161)$$

when  $\text{rank}(\mathbf{M}) = 1$  and  $d = 1$ , the constant  $C$  becomes 1.

*Proof.* According the pseudo inverse theorem, we have

$$\mathbf{M} \mathbf{V} (\mathbf{V}^\top \mathbf{V})^{-1} (\mathbf{U}^\top \mathbf{U})^{-1} \mathbf{U}^\top \mathbf{M} = \mathbf{M} \mathcal{V}_k \Sigma_k^{-1} \mathcal{U}_k \mathbf{M},$$

thus

$$\|\mathbf{M} \mathbf{V} (\mathbf{V}^\top \mathbf{V})^{-1} (\mathbf{U}^\top \mathbf{U})^{-1} \mathbf{U}^\top \mathbf{M} - \mathbf{M}\|_F \leq \|\mathbf{M}\|_F \|\mathbf{M}^\dagger \mathbf{M} \mathcal{V}_k \Sigma_k^{-1} \mathcal{U}_k \mathbf{M} - \mathbf{I}\|_2. \quad (162)$$

Meanwhile,

$$\|\mathbf{M}^\dagger \mathbf{M} \mathcal{V}_k \Sigma_k^{-1} \mathcal{U}_k \mathbf{M} - \mathbf{I}\|_2 \leq \max \{ \|\mathbf{M}^\dagger \mathbf{M} \mathcal{V}_k \Sigma_k^{-1} \mathcal{U}_k \mathbf{M}\|_2 - 1, 1 - \sigma_r(\mathbf{M}^\dagger \mathbf{M} \mathcal{V}_k \Sigma_k^{-1} \mathcal{U}_k \mathbf{M}) \}. \quad (163)$$

On one hand,

$$\|\mathbf{M}^\dagger \mathbf{M} \mathcal{V}_k \Sigma_k^{-1} \mathcal{U}_k \mathbf{M}\|_2 \leq \frac{\|\mathbf{M} \mathcal{V}_k\|_2 \|\mathcal{U}_k^\top \mathbf{M}\|_2}{\|\mathbf{M}\|_d \|\mathbf{U}_k \mathbf{V}_k^\top\|_d} \leq \tilde{\kappa} \frac{\|\mathbf{M} \mathcal{V}_k\|_F \|\mathcal{U}_k^\top \mathbf{M}\|_F}{\|\mathbf{M}\|_F \|\mathbf{U}_k \mathbf{V}_k^\top\|_F} \quad (164)$$

where  $\tilde{\kappa} = \kappa_1 \kappa_2 \kappa_3 \kappa_4$  and  $\kappa_1 = \sigma_1(\mathbf{M}) / \sigma_d(\mathbf{M}) \dots$

Since  $\|\mathbf{U}_k \mathbf{V}_k^\top\|_F$  is greater than zero, in consequence, we have

$$\|\mathbf{M}^\dagger \mathbf{M} \mathcal{V}_k \Sigma_k^{-1} \mathcal{U}_k \mathbf{M}\|_2 - 1 < C_1 \left( \frac{\|\mathbf{M} \mathcal{V}_k\|_F \|\mathcal{U}_k^\top \mathbf{M}\|_F}{\|\mathbf{M}\|_F \|\mathbf{U}_k \mathbf{V}_k^\top\|_F} - 1 \right)$$

and similarly, we have

$$1 - \sigma_r(\mathbf{M}^\dagger \mathbf{M} \mathcal{V}_k \Sigma_k^{-1} \mathcal{U}_k \mathbf{M}) < C_2 \left( 1 - \frac{\|\mathbf{M} \mathcal{V}_k\|_F \|\mathcal{U}_k^\top \mathbf{M}\|_F}{\|\mathbf{M}\|_F \|\mathbf{U}_k \mathbf{V}_k^\top\|_F} \right)$$

together with Eq. (162) and Eq. (163), we finish our proof. □

**Lemma 15.** Let  $\mathbf{U}_k$  and  $\mathbf{V}_k$  are given by Eq. (1) or Eq. (2) and  $\mathbf{U}_k \boldsymbol{\Sigma}_k \mathbf{V}_k^\top = \mathbf{U}_k \mathbf{V}_k^\top$ ,  $\mathbf{U}_* \boldsymbol{\Sigma}_* \mathbf{V}_*^\top = \mathbf{M}$  are the SVD of  $\mathbf{U}_k \mathbf{V}_k^\top$  and  $\mathbf{M}$  respectively, then we have

$$\frac{\|\mathbf{U}_{k\perp}^\top \mathbf{M}\|_F}{\|\mathbf{M}\|_F} \leq \frac{\|\mathbf{U}_{*\perp}^\top \mathbf{U}_k\|_F}{\|\mathbf{U}_k \mathbf{V}_k^\top\|_F} \mathfrak{L}_u. \quad (165)$$

and

$$\frac{\|\mathbf{V}_{k\perp}^\top \mathbf{M}^\top\|_F}{\|\mathbf{M}\|_F} \leq \frac{\|\mathbf{V}_{*\perp}^\top \mathbf{V}_k\|_F}{\|\mathbf{U}_k \mathbf{V}_k^\top\|_F} \mathfrak{L}_v \quad (166)$$

where  $\mathfrak{L}_u$  and  $\mathfrak{L}_v$  are bounded values.

*Proof.* Let  $\mathbf{U}_k^\top \mathbf{U}_* = \mathbf{A}_{uk} \cos \boldsymbol{\Theta}_{uk} \mathbf{B}_{uk}^\top$  be the SVD decomposition. Then  $\|\mathbf{U}_{*\perp}^\top \mathbf{U}_k\|_F^2$  becomes

$$\text{Trace}(\boldsymbol{\Sigma}_{uk} \mathbf{U}_k^\top \mathbf{U}_{*\perp} \mathbf{U}_{*\perp}^\top \mathbf{U}_k \boldsymbol{\Sigma}_{uk}) = \text{Trace}(\boldsymbol{\Sigma}_{uk} \mathbf{A}_{uk} \sin^2 \boldsymbol{\Theta}_{uk} \mathbf{A}_{uk}^\top \boldsymbol{\Sigma}_{uk}) = \|\sin \boldsymbol{\Theta}_{uk} \mathbf{A}_{uk}^\top \boldsymbol{\Sigma}_{uk}\|_F^2 \quad (167)$$

Similarly, we have

$$\begin{aligned} \|\mathbf{U}_{k\perp}^\top \mathbf{M}\|_F^2 &= \text{Trace}(\boldsymbol{\Sigma}_* \mathbf{U}_*^\top \mathbf{U}_{k\perp} \mathbf{U}_{k\perp}^\top \mathbf{U}_* \boldsymbol{\Sigma}_*) \\ &= \text{Trace}(\boldsymbol{\Sigma}_* \mathbf{B}_{uk} \sin^2 \boldsymbol{\Theta}_{uk} \mathbf{B}_{uk}^\top \boldsymbol{\Sigma}_*) = \|\sin \boldsymbol{\Theta}_{uk} \mathbf{B}_{uk}^\top \boldsymbol{\Sigma}_*\|_F^2 \end{aligned} \quad (168)$$

The Eq. (167) and Eq. (168) indicate that

$$\|\mathbf{U}_{k\perp}^\top \mathbf{M}\|_F = \|\sin \boldsymbol{\Theta}_{uk} \mathbf{B}_{uk}^\top \boldsymbol{\Sigma}_*\|_F \text{ and } \|\mathbf{U}_{*\perp}^\top \mathbf{U}_k \boldsymbol{\Sigma}_{uk}\|_F = \|\sin \boldsymbol{\Theta}_{uk} \mathbf{A}_{uk}^\top \boldsymbol{\Sigma}_{uk}\|_F, \quad (169)$$

which implies

$$\|\mathbf{U}_{k\perp}^\top \mathbf{M}\|_F = \|\sin \boldsymbol{\Theta}_{uk} \mathbf{A}_{uk}^\top \boldsymbol{\Sigma}_{uk} \boldsymbol{\Sigma}_{uk}^{-1} \mathbf{A}_{uk} \mathbf{B}_{uk}^\top \boldsymbol{\Sigma}_*\|_F \leq \|\mathbf{U}_{*\perp}^\top \mathbf{U}_k\|_F \|\boldsymbol{\Sigma}_{uk}^{-1} \mathbf{A}_{uk} \mathbf{B}_{uk}^\top \boldsymbol{\Sigma}_*\|_F. \quad (170)$$

In consequence

$$\frac{\|\mathbf{U}_{k\perp}^\top \mathbf{U}_* \boldsymbol{\Sigma}_*\|_F}{\|\boldsymbol{\Sigma}_*\|_F} \leq \frac{\|\mathbf{U}_{*\perp}^\top \mathbf{U}_k\|_F}{\|\mathbf{U}_k \mathbf{V}_k^\top\|_F} \underbrace{\|\boldsymbol{\Sigma}_{uk}^{-1} \mathbf{A}_{uk} \mathbf{B}_{uk}^\top \boldsymbol{\Sigma}_*\|_F}_{\mathfrak{L}_u} \frac{\|\mathbf{U}_k \mathbf{V}_k^\top\|_F}{\|\boldsymbol{\Sigma}_*\|_F}, \quad (171)$$

thus we obtain

$$\frac{\|\mathbf{U}_{k\perp}^\top \mathbf{M}\|_F}{\|\mathbf{M}\|_F} \leq \frac{\|\mathbf{U}_{*\perp}^\top \mathbf{U}_k\|_F}{\|\mathbf{U}_k \mathbf{V}_k^\top\|_F} \mathfrak{L}_u, \quad (172)$$

where  $\mathfrak{L}_u$  is bounded value. Let  $\mathbf{V}_k^\top \mathbf{V}_* = \mathbf{A}_{vk} \cos \boldsymbol{\Theta}_{vk} \mathbf{B}_{vk}^\top$ , in the same way, we have

$$\frac{\|\mathbf{V}_{k\perp}^\top \mathbf{M}^\top\|_F}{\|\mathbf{M}\|_F} \leq \frac{\|\mathbf{V}_{*\perp}^\top \mathbf{V}_k\|_F}{\|\mathbf{U}_k \mathbf{V}_k^\top\|_F} \mathfrak{L}_v \quad (173)$$

where  $\mathfrak{L}_v = \|\boldsymbol{\Sigma}_{vk}^{-1} \mathbf{A}_{vk} \mathbf{B}_{vk}^\top \boldsymbol{\Sigma}_*\|_F \frac{\|\mathbf{U}_k \mathbf{V}_k^\top\|_F}{\|\boldsymbol{\Sigma}_*\|_F}$  is bounded value. □

**Lemma 16.** Let  $\mathbf{U}_k, \mathbf{V}_k$  be updated by Eq. (1), then with the learning rate  $\eta \leq c_\eta$ , we have

$$\kappa(\mathbf{U}_k \mathbf{V}_k^\top) \leq \mathfrak{m}, \kappa(\mathbf{U}_k) \leq \mathfrak{u}, \kappa(\mathbf{V}_k) \leq \mathfrak{v}, \forall k \quad (174)$$

where  $\kappa(\mathbf{X})$  outputs the condition number of a matrix  $\mathbf{X}$ ,  $\mathfrak{u}, \mathfrak{v}, \mathfrak{m}$  are bounded positive constant.

*Proof.* With Eq. (1), the product of the matrix  $\mathbf{U}$  and  $\mathbf{V}$  are updated by

$$\mathbf{U}_{k+1} \mathbf{V}_{k+1}^\top = (1-\eta)^2 \mathbf{U}_k \mathbf{V}_k^\top + \eta(1-\eta) \mathbf{U}_k \mathbf{U}_k^\top \mathbf{M} + \eta(1-\eta) \mathbf{M} \mathbf{V}_k \mathbf{V}_k^\top + \eta^2 \mathbf{M} \mathbf{V}_k \boldsymbol{\Sigma}_k^{-1} \mathbf{U}_k^\top \mathbf{M} \quad (175)$$

To guarantee that the condition number  $\kappa(\mathbf{U}_k \mathbf{V}_k^\top)$  of the matrix  $\mathbf{U}_k \mathbf{V}_k^\top, \forall k$  are bounded, we only need to guarantee that  $\sigma_r(\mathbf{U}_k \mathbf{V}_k^\top)$  is strictly greater than 0 according to Eq. (175). Next, we prove by contradiction. If we assume that there exists  $k$  such that  $\sigma_r(\mathbf{U}_k \mathbf{V}_k^\top) \leq \epsilon, \forall \epsilon \geq 0$ , then we have that  $\forall \mathfrak{M} \geq 0, \sigma_1(\mathbf{U}_{k+1} \mathbf{V}_{k+1}^\top) \geq \mathfrak{M}$  according to Eq. (175), which indicates that  $\|\mathbf{U}_{k+1} \mathbf{V}_{k+1}^\top\|_F \geq \mathfrak{M}, \forall \mathfrak{M} \geq 0$ .

Meanwhile, we have

$$\begin{aligned}\|U_{k+1}V_{k+1}^\top\|_F &= \|(1-\eta)^2U_kV_k^\top + \eta(1-\eta)U_kU_k^\top M + \eta(1-\eta)M\mathcal{V}_k\mathcal{V}_k^\top + \eta^2M\mathcal{V}_k\Sigma_k^{-1}U_k^\top M\|_F \\ &\leq (1-\eta)^2\|U_kV_k^\top\|_F + 2\eta(1-\eta)\|M\|_F + \eta^2\|M\mathcal{V}_k\Sigma_k^{-1}U_k^\top M\|_F\end{aligned}\quad (176)$$

which indicates that the upper-bound of  $\|U_kV_k^\top\|_F$  will decrease with the increase of  $k$  if  $\|U_kV_k^\top\|_F$  is greater than some constant related to  $\|M\mathcal{V}_k\Sigma_k^{-1}U_k^\top M\|_F$ . The result is in contradict to that  $\|U_{k+1}V_{k+1}^\top\|_F \geq \mathfrak{M}, \forall \mathfrak{M} \geq 0$ , which proves that  $\sigma_r(U_kV_k^\top)$  is strictly greater than zero. Therefore, we can guarantee that there exist bounded constant value  $\mathfrak{m}$  such that  $\kappa(U_kV_k^\top) \leq \mathfrak{m}$ .

Meanwhile, since

$$\sigma_1(U_kV_k^\top) \leq \sigma_1(U_k)\sigma_1(V_k), \sigma_r(U_kV_k^\top) \geq \sigma_r(U_k)\sigma_r(V_k), \quad (177)$$

we can guarantee that there exist bounded constant  $\mathfrak{u}$  and  $\mathfrak{v}$  such that

$$\kappa(U_k) \leq \mathfrak{u}, \kappa(V_k) \leq \mathfrak{v}, \forall k \quad (178)$$

thus we finish the proof.  $\square$

**Lemma 17.** Let  $U_k$  and  $V_k$  be updated by Eq. (1), if  $\langle U_kV_k^\top, M \rangle \geq \|U_kV_k^\top\|_F^2$ , then we have that

$$\|U_{k+1}V_{k+1}^\top\|_F \geq \|U_kV_k^\top\|_F. \quad (179)$$

*Proof.* Based on the update Eq. (1), we have

$$\begin{aligned}\|U_{k+1}V_{k+1}^\top\|_F^2 &= (1-\eta)^2\|U_kV_k^\top\|_F^2 + 2\eta(1-\eta)\langle U_kV_k^\top, U_k(U_k^\top U_k)^{-1}U_k^\top M \rangle \\ &\quad + \eta^2\|U_k(U_k^\top U_k)^{-1}U_k^\top M\|_F^2\end{aligned}\quad (180)$$

Meanwhile, according to Lemma 13, we have that  $\|U_k(U_k^\top U_k)^{-1}U_k^\top M\|_F^2 \geq \|U_kV_k^\top\|_F^2$ , together with  $\langle U_kV_k^\top, M \rangle \geq \|U_kV_k^\top\|_F^2$  the following holds

$$\|U_{k+1}V_{k+1}^\top\|_F^2 \geq \|U_kV_k^\top\|_F^2$$

On the other hand,

$$\begin{aligned}\|U_{k+1}V_{k+1}^\top\|_F^2 &= (1-\eta)^2\|U_{k+1}V_k^\top\|_F^2 + 2\eta(1-\eta)\langle U_{k+1}V_k^\top, U_{k+1}(U_k^\top U_k)^{-1}U_k^\top M \rangle \\ &\quad + \eta^2\|U_{k+1}(U_k^\top U_k)^{-1}U_k^\top M\|_F^2\end{aligned}\quad (181)$$

and  $\|U_{k+1}(U_k^\top U_k)^{-1}U_k^\top M\|_F^2 \geq \|U_kV_k^\top\|_F^2$ ,  $\langle U_{k+1}V_k^\top, U_{k+1}(U_k^\top U_k)^{-1}U_k^\top M \rangle \geq \|U_kV_k^\top\|_F^2$  we have the result in Eq. (179).  $\square$

**Lemma 18.** Let  $\tau_k = \frac{\langle U_kV_k^\top, M \rangle}{\|U_kV_k^\top\|_F^2}$ , if  $1 \geq \tau_k \geq 1/2$ , then we have that

$$\frac{\|U_kV_k^\top\|_F}{\|U_{k+1}V_{k+1}^\top\|_F} \leq \frac{1}{(1-\eta+\eta\tau_k)^2} \quad (182)$$

*Proof.* Note that

$$\begin{aligned}\|U_{k+1}V_{k+1}^\top\|_F^2 &= (1-\eta)^2\|U_kV_k^\top\|_F^2 + 2\eta(1-\eta)\langle U_kV_k^\top, U_k(U_k^\top U_k)^{-1}U_k^\top M \rangle \\ &\quad + \eta^2\|U_k(U_k^\top U_k)^{-1}U_k^\top M\|_F^2\end{aligned}\quad (183)$$

thus

$$\begin{aligned}\frac{\|U_{k+1}V_{k+1}^\top\|_F^2}{\|U_kV_k^\top\|_F^2} &= (1-\eta)^2 + 2\eta(1-\eta)\frac{\langle U_kV_k^\top, M \rangle}{\|U_kV_k^\top\|_F^2} + \eta^2\frac{\|U_k(U_k^\top U_k)^{-1}U_k^\top M\|_F^2}{\|U_kV_k^\top\|_F^2} \\ &= (1-\eta)^2 + 2\eta(1-\eta)\tau_k + \eta^2\frac{\|U_kU_k^\top M\|_F^2\|U_kV_k^\top\|_F^2}{\|U_kV_k^\top\|_F^4} \\ &\geq (1-\eta)^2 + 2\eta(1-\eta)\tau_k + \eta^2\frac{\langle U_kV_k^\top, M \rangle}{\|U_kV_k^\top\|_F^2} \\ &\geq (1-\eta)^2 + 2\eta(1-\eta)\tau_k + \eta^2\tau_k^2 \\ &= (1-\eta+\eta\tau_k)^2\end{aligned}\quad (184)$$

In the same vein

$$\begin{aligned} \|\mathbf{U}_{k+1} \mathbf{V}_{k+1}^\top\|_F^2 &= (1-\eta)^2 \|\mathbf{U}_{k+1} \mathbf{V}_k^\top\|_F^2 + 2\eta(1-\eta) \langle \mathbf{U}_{k+1} \mathbf{V}_k^\top, \mathbf{U}_{k+1} (\mathbf{U}_k^\top \mathbf{U}_k)^{-1} \mathbf{U}_k^\top \mathbf{M} \rangle \\ &\quad + \eta^2 \|\mathbf{U}_{k+1} (\mathbf{U}_k^\top \mathbf{U}_k)^{-1} \mathbf{U}_k^\top \mathbf{M}\|_F^2 \end{aligned} \quad (185)$$

If  $\langle \mathbf{U}_k \mathbf{V}_k, \mathbf{M} \rangle \leq \|\mathbf{U}_k \mathbf{V}_k^\top\|_F^2$  we know that the norm of  $\mathbf{U}_k \mathbf{V}_k^\top$  decreases and  $\|\mathbf{U}_{k+t} \mathbf{V}_k^\top\|_F^2 \geq \|\mathbf{U}_{k+t} \mathbf{V}_{k+1}^\top\|_F^2$ , therefore

$$\begin{aligned} \frac{\langle \mathbf{U}_{k+1} \mathbf{V}_k^\top, \mathbf{U}_{k+1} (\mathbf{U}_k^\top \mathbf{U}_k)^{-1} \mathbf{U}_k^\top \mathbf{M} \rangle}{\|\mathbf{U}_{k+1} \mathbf{V}_k^\top\|_F^2} &\geq \frac{\langle \mathbf{U}_{k+1} \mathbf{V}_k^\top, \mathbf{U}_{k+1} (\mathbf{U}_k^\top \mathbf{U}_k)^{-1} \mathbf{U}_k^\top \mathbf{M} \rangle}{\|\mathbf{U}_k \mathbf{V}_k^\top\|_F^2} \\ &\geq \frac{\langle \mathbf{U}_k \mathbf{V}_k^\top, \mathbf{U}_k \mathbf{U}_k^\top \mathbf{M} \rangle}{\|\mathbf{U}_k \mathbf{V}_k^\top\|_F^2} = \tau_k \end{aligned} \quad (186)$$

and similarly, we have

$$\begin{aligned} \frac{\|\mathbf{U}_{k+1} (\mathbf{U}_k^\top \mathbf{U}_k)^{-1} \mathbf{U}_k^\top \mathbf{M}\|_F^2}{\|\mathbf{U}_{k+1} \mathbf{V}_k^\top\|_F^2} &\geq \frac{\|\mathbf{U}_{k+1} (\mathbf{U}_k^\top \mathbf{U}_k)^{-1} \mathbf{U}_k^\top \mathbf{M}\|_F^2}{\|\mathbf{U}_k \mathbf{V}_k^\top\|_F^2} \\ &\geq \frac{\|\mathbf{U}_k (\mathbf{U}_k^\top \mathbf{U}_k)^{-1} \mathbf{U}_k^\top \mathbf{M}\|_F^2}{\|\mathbf{U}_k \mathbf{V}_k^\top\|_F^2} \\ &\geq \frac{\langle \mathbf{U}_k \mathbf{V}_k^\top, \mathbf{M} \rangle^2}{\|\mathbf{U}_k \mathbf{V}_k^\top\|_F^4} \geq \tau_k^2 \end{aligned} \quad (187)$$

In consequence, we have the result

$$\frac{\|\mathbf{U}_{k+1} \mathbf{V}_{k+1}^\top\|_F^2}{\|\mathbf{U}_{k+1} \mathbf{V}_k^\top\|_F^2} \geq (1-\eta)^2 + 2\eta(1-\eta)\tau_k + \eta^2\tau_k^2 = (1-\eta + \eta\tau_k)^2. \quad (188)$$

Together with Eq. (184) and Eq. (188), we have the result in Eq. (182).  $\square$
